# Supplementary material
Source: ML conference proceedings conference paper supplement (https://openreview.net/forum?id=FKhMrV1nvz)
Supplement: supplementary_material [file attachment]

# TEACHING LLMs TO PLAN: LOGICAL CHAIN-OF-THOUGHT INSTRUCTION TUNING FOR SYMBOLIC PLANNING

**Anonymous authors**

Paper under double-blind review

## ABSTRACT

Large language models (LLMs) have demonstrated impressive capabilities across diverse tasks, yet their ability to perform structured symbolic planning remains limited, particularly in domains requiring formal representations like the Planning Domain Definition Language (PDDL). In this paper, we present a novel instruction tuning framework, PDDL-INSTRUCT, designed to enhance LLMs’ symbolic planning capabilities through logical chain-of-thought reasoning. Our approach focuses on teaching models to rigorously reason about action applicability, state transitions, and plan validity using explicit logical inference steps. By developing instruction prompts that guide models through the precise logical reasoning required to determine when actions can be applied in a given state, we enable LLMs to self-correct their planning processes through structured reflection. ~~The framework systematically builds verification skills by decomposing the planning process into explicit reasoning chains about precondition satisfaction, effect application, and invariant preservation.~~ Unlike prompting-based neuro-symbolic approaches, PDDL-INSTRUCT updates model parameters directly using verification feedback, enabling more efficient learning from external validators. Experimental results on multiple planning domains show that our chain-of-thought reasoning based instruction-tuned models are significantly better at planning, achieving planning accuracy of up to 94% on standard benchmarks, representing a 66% absolute improvement over untuned baseline models. This work bridges the gap between the general reasoning capabilities of LLMs and the logical precision required for automated planning, offering a promising direction for developing better AI planning systems.

## 1 INTRODUCTION

Large Language Models (LLMs) like GPT (OpenAI et al., 2023), Gemini (Gemini Team et al., 2023), LLaMA (Touvron et al., 2023), etc. have demonstrated remarkable success across various domains including mathematics and coding (Imani et al., 2023; Gaur & Saunshi, 2023; Romera-Paredes et al., 2023; Ahn et al., 2024). However, a critical gap remains in their ability to perform structured symbolic planning – a fundamental capability required for reliable real-world sequential decision-making systems. Recent studies have highlighted this issue that while LLMs excel at general reasoning over unstructured text, they struggle with the logical reasoning and systematic verification required for automated planning tasks (Stechly et al., 2023; Valmeekam et al., 2023a;c; Kambhampati et al., 2024; Stechly et al., 2025).

This limitation becomes particularly evident when considering formal planning representations such as the Planning Domain Definition Language (PDDL) (McDermott et al., 1998). Despite some promising results with specific configurations (Liu et al., 2023; Wang et al., 2024), these models generally perform poorly on multi-step reasoning tasks including classical planning (Hsiao et al., 2025). This has significant implications for planning tasks, which are PSPACE-complete (Bylander, 1991) and inherently require scaling reasoning efforts with problem complexity.

Recent work has explored neuro-symbolic approaches that combine LLMs with external verifiers in a Generate-Test-Critique loop (LLM-Modulo framework (Kambhampati et al., 2024)). While

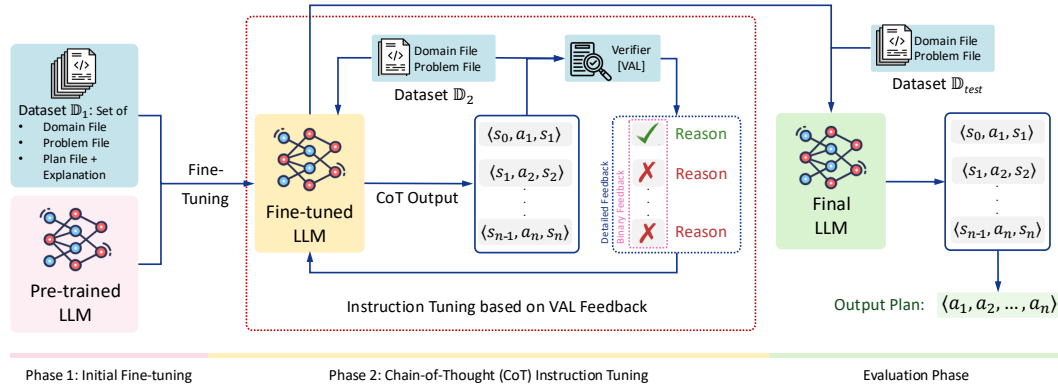

Figure 1: The PDDL-INSTRUCT approach consists of three phases: Two training phases (Initial and CoT Instruction Tuning) and evaluation phase. The main innovation lies in the second phase: CoT Instruction Tuning (highlighted by the red boundary). The initially tuned LLM is further trained using a structured instruction process that emphasizes complete logical reasoning chains.

these methods improve plan validity through prompting-based feedback, they suffer from a critical limitation that the feedback is used only at inference time to guide generation, not to update model parameters. This means LLMs must re-learn correct planning principles through multiple feedback iterations, making the approach computationally expensive and potentially unstable to self-correction failures (Stechly et al., 2025). We propose a different direction of using verification feedback to directly update model parameters during training.

In this paper, we ~~challenge this limitation by introducing~~ introduce PDDL-INSTRUCT, a novel framework shown in Fig. 1, that augments LLMs’ reasoning capabilities with the formal reasoning required for automated planning. PDDL-INSTRUCT explicitly teaches LLMs to reason through the precondition-effect structure of planning domains using logical chain-of-thought prompting. ~~By decomposing planning verification into atomic reasoning steps and incorporating this structure into instruction tuning, our approach enables LLMs to not only generate syntactically correct plans but also to verify their logical validity through step-by-step reasoning. This ability to perform structured verification significantly enhances the reliability of LLM-generated plans and opens up possibilities for self-correction through iterative refinement.~~ Rather than attempting to compete with symbolic planners which achieve 100% accuracy on these problems, our goal is to improve how LLMs learn to reason about planning through systematic instruction tuning and verification feedback. This foundational improvement in LLM planning capabilities is a necessary step toward developing hybrid systems that leverage both LLM flexibility and symbolic verification.

Main contributions of this paper are:

- A ~~novel parameter-update-based~~ instruction tuning framework that enhances symbolic planning ~~capabilities~~ in LLMs through logical chain-of-thought reasoning, focusing specifically on plan-generation and action applicability verification.
- A formalization of ~~the planning verification process~~ planning verification as decomposable reasoning chains with domain-informed loss functions, enabling LLMs to systematically check preconditions, apply effects, and validate invariants. This allows gradient-based optimization to directly target planning semantics rather than generic language modeling objectives.
- Empirical evidence ~~demonstrating that that parameter-update-based~~ instruction-tuned LLMs can develop robust planning capabilities that generalize across domains develop robust, generalizable planning capabilities within a single multi-domain model, without domain-specific retraining, achieving 94% accuracy on BlocksWorld and generalizing to unseen domains with 8-9% relative degradation.

Our results show that PDDL-INSTRUCT significantly outperforms both baseline models and traditionally instruction-tuned models, achieving planning validity rates of up to 94% in standard planning domains. This work not only addresses a critical limitation in current LLM capabilities but also

provides a foundation for developing more trustworthy AI systems capable of reliable planning in complex scenarios.

## 2 RELATED WORK

**LLMs for planning** Planning The use of LLMs for planning has received a lot of attention (Pallagani et al., 2024). Various approaches have been used so far, such as dictating the planned behaviors by generating executable code (Liang et al., 2023; Singh et al., 2023; Nijkamp et al., 2023; Wang et al., 2025) or behavior trees (Zhou et al., 2024a; Izzo et al., 2024; Ao et al., 2025), using closed loop with environment feedback (Huang et al., 2022; Song et al., 2023; Sun et al., 2023) or for self-refinement (Wang et al., 2023; Zhou et al., 2024b). A few recent approaches also synthesize Python programs using LLMs for planning (Silver et al., 2024; Hao et al., 2025b; Chen et al., 2025b; Hu et al., 2025; Chi et al., 2025). A complementary research direction explores using LLMs for parts of the search process, like generating heuristics (Ahn et al., 2022; Liu et al., 2024; Corrêa et al., 2025), reducing large search spaces (Zhao et al., 2023), predicting transition functions (Shlomi et al., 2025), etc.

However, as summarized in Tantakoun et al. (2025), LLMs face challenges with long-term planning and reasoning, often producing unreliable plans (Stechly et al., 2024; Pallagani et al., 2023; Momennejad et al., 2023), frequently failing to account for the effects and requirements of actions as they scale (Stechly et al., 2024), and their performance degrades with self-iterative feedback (Stechly et al., 2023; Valmeekam et al., 2023a; Huang et al., 2025b).

Finetuning for planning improves significantly the model’s capabilities to generate symbolic plans (Pallagani et al., 2023; Li et al., 2025; Fu et al., 2025). However, the main drawbacks of this approach are its high economic, time, and computational costs, as well as the degradation of the transferability of the model. Finetuning makes the model specialized on the domains and problem types trained on, with poor transferability to new problems. An extended literature review on LLMs and Planning is available in the appendix.

**Instruction-tuning LLM Modulo Approaches** A popular neuro-symbolic approach for using LLMs for symbolic tasks is to integrate them with symbolic verifier similar to a LLM Modulo framework (Kambhampati et al., 2024). Various approaches based on this framework, like CoT-TL (Manas et al., 2024), Code-as-Symbolic-Planner (Chen et al., 2025c), Planning using Neuro Symbolic Reasoning (Jha et al., 2023), LEPA (Zhang et al., 2025a), STaR (Zelikman et al., 2022), etc. use a verifier to give feedback on the wrong output generated by an LLM. While these approaches improve plan quality, they operate through prompting-based feedback loops at inference time. In contrast, PDDL-INSTRUCT uses verification feedback to update model parameters during training, enabling the model to learn robust planning reasoning rather than relying on repeated prompting. Additionally, our domain-informed loss functions (encoding precondition checking, effect application, goal verification) directly optimize planning semantics, whereas existing methods treat feedback as text for in-context learning.

**Instruction Tuning** Instruction tuning has emerged as a significant approach in NLP to enable zero-shot generalization on unseen tasks (Mishra et al., 2022; Wei et al., 2022a; Ouyang et al., 2022). This technique involves fine-tuning large language models to perform diverse tasks by following instructions, making the task source crucial for effective tuning (Longpre et al., 2023). While existing methods often rely on human-crowdsourced tasks from datasets like T0 (Sanh et al., 2022), FLAN (Wei et al., 2022a; Longpre et al., 2023), and NaturalInstructions (Mishra et al., 2022; Wang et al., 2022), these high-quality resources demand significant human effort and are typically limited in quantity. An alternative approach involves model-generated tasks, where powerful language models like GPT-3 and GPT-4 generate diverse instructions and task pairs (Wang et al., 2022; Peng et al., 2023), though these can introduce noise when outputs don’t properly correspond to inputs. In this work, we alleviate this problem by leveraging the automated planning task generators (Seipp et al., 2022; Valmeekam et al., 2023b) to create the instruction tuning dataset.

**Chain-of-Thought Reasoning** A significant advancement in improving LLM reasoning ability is the implementation of Chain of Thought (CoT) prompting (Wei et al., 2022b). By generating explicit intermediate reasoning steps, these models can now address complex logical deduction and multistep

problem-solving. Short CoT approaches (Lambert et al., 2025; Kojima et al., 2022) demonstrated effectiveness for straightforward problems but revealed limitations when confronting more intricate challenges. The evolution toward longer reasoning chains has subsequently transformed the landscape of machine reasoning. Stechly et al. (2024) argued that despite its efficacy for reasoning tasks, CoT is not suitable for planning, but in this work we show that with proper integration of instruction tuning using better prompts, CoT can indeed be used for planning tasks.

### 3 PRELIMINARIES

**Automated Planning** In this section, we briefly describe automated planning. Please refer to Geffner & Bonet (2013) and Chen et al. (2025a) for more details.

An automated planning problem can be formally characterized as a tuple  $\langle P, A, s_0, G \rangle$ , where  $P$  is a set of fluents used to describe a discrete and fully-observable state  $S$ ,  $A$  represents a finite set of actions,  $s_0 \in S$  denotes the initial state, and  $G$  specifies the goal conditions. Each action  $a_i \in A$  is defined as  $\langle pre(a_i), add(a_i), del(a_i) \rangle$ , where  $pre(a_i)$  is the set of fluents that must hold in the current state for the action to be executable,  $add(a_i)$  is the set of fluents that become true after executing  $a_i$ , and  $del(a_i)$  is the set of fluents that become false after executing  $a_i$ . Note that the state space  $S$  in classical planning emerges from all possible truth assignments to the set of fluents.

A solution to a planning problem  $\mathcal{P}$ , called a plan  $\pi$ , is a sequence of actions  $\langle a_1, a_2, \dots, a_n \rangle$  that transforms the initial state into one satisfying the goal conditions after  $n$  steps. Note that  $\pi$  produces state transitions  $s_{i+1} = a_{i+1}(s_i) = (s_i \setminus del(a_{i+1})) \cup add(a_{i+1})$  for all  $0 \leq i < n$  such that  $s_n \in G$ .  $\pi$  is considered *optimal* if it takes the least number of actions (in this work, we consider actions with uniform cost) to reach a goal state, whereas it is considered *satisficing* if it reaches the goal successfully but with more actions than needed by an optimal plan.

The Planning Domain Definition Language (PDDL) (McDermott et al., 1998), based on STRIPS (Fikes & Nilsson, 1971), provides a standardized specification for automated planning problems. PDDL consists of a *domain*  $\mathcal{D} = \langle P, A \rangle$  containing the sets of fluents  $P$  and actions  $A$  (along with their precondition, *add* and *del* sets), and a *problem*  $\mathcal{P} = \langle s_0, G \rangle$  containing the initial state  $s_0$ , and a goal condition  $G$ .

**Instruction Tuning** Instruction tuning (Mishra et al., 2022; Wei et al., 2022a; Ouyang et al., 2022) is an approach for fine-tuning LLMs on a labeled dataset. Consider an instruction tuning dataset  $\mathbb{D}_1 = \{(x_i, \tau_i)\}_{i=1}^{\Omega}$  with  $\Omega$  labeled samples, where  $x_i$  represents an instruction and  $\tau_i$  its corresponding ideal target response. We denote our large language model as  $\mathcal{M}_\theta$  with parameters  $\theta$ . The model produces output  $\mathcal{M}_\theta(x_i)$  for a given instruction  $x_i$ . The standard instruction tuning objective aims to find model parameters  $\theta^*$  that minimize expected discrepancy (loss  $\mathcal{L}$ ) between model predictions ( $\mathcal{M}_\theta(x)$ ) and target responses ( $\tau$ ) across the instruction dataset (Dataset  $\mathbb{D}_1$ , as described in Sec. 4):

$$\theta^* = \arg \min_{\theta} \mathbb{E}_{(x, \tau) \sim \mathbb{D}_1} [\mathcal{L}(\mathcal{M}_\theta(x), \tau)] \quad (1)$$

**Chain-of-thought reasoning** Chain-of-Thought (CoT) reasoning can be formally defined as a structured decomposition of a complex reasoning task into an explicit sequence of intermediate logical steps. Given a problem input  $x$  and a target output  $y$ , a chain-of-thought reasoning process  $\mathcal{R}$  is a sequence of  $K$  intermediate reasoning states  $\mathcal{Z}(x) = (z_1, z_2, \dots, z_K)$ , where each  $z_i$  represents an atomic reasoning step that transforms the latent state from  $z_{i-1}$  to  $z_i$ , with  $z_0$  implicitly defined as the initial problem state derived from  $x$ . Each reasoning step  $z_i$  can be characterized as a tuple  $z_i = (s_i, j_i, u_i)$ , where  $s_i$  represents the symbolic state (the set of derived facts or assertions at step  $i$ ),  $j_i$  represents the justification (the logical rule or inference applied), and  $u_i$  represents the uncertainty estimate (the model’s confidence in this reasoning step). For simplicity, going forward we will use symbolic states  $s_i$  to represent reasoning states  $z_i$ , when clear from context, as they have a one-to-one mapping for this work. We also do not use  $u_i$  estimates for this work, and the LLM is directly asked for the resulting symbolic states in each CoT step.

Two important properties that characterize effective chain-of-thought reasoning are: (i) logical coherence (Wei et al., 2022b), and (ii) progressive refinement (Du et al., 2025). A CoT process  $\mathcal{R}(x)$  exhibits *logical coherence* if for each step  $z_i$  with  $i > 1$ ,  $\exists j_{i-1}$  such that  $j_{i-1}(s_{i-1}) \Rightarrow s_i$ , meaning

each state follows logically from the application of a justifiable inference rule to the previous state. A CoT process  $\mathcal{R}(x)$  exhibits *progressive refinement* if  $I(z_i; y) > I(z_{i-1}; y) \quad \forall i \in \{1, 2, \dots, K\}$ , where  $I(z_i; y)$  represents the mutual information between reasoning state  $z_i$  and the target output  $y$ .

## 4 PROBLEM FORMULATION

**Input** In this work, we use the following inputs: (i) a pre-trained LLM  $\mathcal{M}$  as input, (ii) a dataset  $\mathbb{D}$  of planning domains and problems expressed in PDDL with their solutions (satisficing plans), and (iii) a plan validator  $\mathcal{V}$  used to validate the correctness of plans generated by  $\mathcal{M}$ . The dataset  $\mathbb{D}$  consists of:

1. A set  $\{\mathcal{D}_1, \mathcal{D}_2, \dots, \mathcal{D}_n\}$  of planning domains expressed in PDDL.
2. For each domain  $\mathcal{D}_i$ , we have problems  $\mathbb{P}_i = \{\mathcal{P}_{i,1}, \mathcal{P}_{i,2}, \dots, \mathcal{P}_{i,m_i}\}$ .
3. For each planning problem  $\mathcal{P}_{i,j}$ , we have a valid plan  $\Pi_{i,j} = \{\pi_{i,j,1}, \pi_{i,j,2}, \dots, \pi_{i,j,k_{i,j}}\}$ , where each plan  $\pi_{i,j,l}$  is a sequence of grounded actions.

~~**Data Splitting** As shown in Fig. 1, our approach has three phases (more details in Sec. 5). To facilitate this, we partition the dataset  $\mathbb{D}$  into three sets:  $\mathbb{D}_1$ ,  $\mathbb{D}_2$ , and  $\mathbb{D}_{\text{test}}$  for Phase 1 training, Phase 2 training, and evaluation, respectively.~~

~~We add additional data to  $\mathbb{D}_1$  by adding incorrect plans for each problem, similar to NaturalInstructions framework (Mishra et al., 2022; Wang et al., 2022). We also add a plan validator’s output for each plan (both correct and incorrect) as an explanation to the dataset. We remove the solution plans from datasets  $\mathbb{D}_2$  and  $\mathbb{D}_{\text{test}}$ .~~

**Output** The primary output is an instruction-tuned model  $\mathcal{M}_{\theta^*}$  with enhanced symbolic planning capabilities. The model should demonstrate improved domain representation, problem representation, plan generation, action verification, plan verification, and reasoning transparency.

**Assumptions** Our framework assumes the planning domains follow the features explained in Sec. 3, i.e., does not contain complex PDDL features such as, e.g., conditional effects or durative actions. This simplifies the reasoning chain.

## 5 PDDL-INSTRUCT: METHODOLOGY

Fig. 1 illustrates our comprehensive framework for enhancing symbolic planning capabilities in Large Language Models (LLMs) through logical Chain-of-Thought (CoT) instruction tuning. The approach consists of two training phases: Initial Instruction Tuning and CoT Instruction Tuning.

### 5.1 TRAINING THE MODEL

**[Phase 1] Initial Instruction Tuning Phase** In the initial instruction tuning phase (distinct from simple finetuning), we take a pre-trained LLM and train it with carefully crafted prompts that pair planning domains and problems with detailed explanations of their solutions, all derived from Dataset  $\mathbb{D}_1$ . As shown in Fig. 1, rather than simply exposing the model to planning examples, we explicitly instruct it to analyze why each action in a plan is valid by explaining precondition satisfaction and effect application.

This phase incorporates both correct plans and deliberately incorrect plans to teach the model to recognize and explain various planning errors. For incorrect plans, we include examples where: (1) action preconditions are not satisfied, (2) effects are incorrectly applied, (3) frame axioms are violated, or (4) the plan fails to reach the goal state. By exposing the model to both successful and failed planning attempts with detailed explanations, we establish a foundation for logical verification. The incorrect plans are generated by randomly replacing one of the actions in the correct plan with another action compatible with the problem. We verify using a plan validator, VAL (Howey et al., 2004), that this new plan is incorrect. We also add VAL’s output for each plan (both correct and incorrect) to the dataset. For a few-subset of plans, we ~~change the VAL’s output to add additional effects~~

~~or remove some effects to have incorrect explanations~~ augmented the VAL explanations to create synthetic negative examples demonstrating incorrect effect application. Specifically, we generated failure scenarios where effects are incorrectly added or removed. This data augmentation strategy ensures the model learns to detect this particular class of planning errors, which VAL’s output does not naturally produce.

This phase establishes a foundation of planning knowledge while simultaneously teaching the model to articulate logical justifications for action validity, setting the stage for more advanced reasoning in subsequent phases. Exact prompts used in this work are available in the supplementary material.

**[Phase 2] CoT Instruction Tuning Phase** The main innovation of our approach lies in the CoT Instruction Tuning phase (highlighted by the red boundary in Fig. 1). This second phase is itself a two-stage process described thoroughly in the next section. At a high level, in this phase, the initially tuned LLM is further trained using a structured instruction process that emphasizes complete logical reasoning chains. When presented with a domain and problem from Dataset  $\mathbb{D}_2$ , this initially tuned model produces step-by-step state-action-state sequences  $\langle s_0, a_1, s_1 \rangle, \langle s_1, a_2, s_2 \rangle, \dots, \langle s_{n-1}, a_n, s_n \rangle$  that represent a candidate plan.

These reasoning chains are then passed through a verification module implemented using VAL (Howey et al., 2004) that systematically checks the validity of each state transition based on action preconditions and effects. Please note that while some approaches have tried using LLMs themselves as verifiers, research shows that currently LLMs do not possess sufficient self-correction capabilities in terms of reasoning (Huang et al., 2024; Stechly et al., 2025). Unlike self-reflection approaches where models attempt to critique their own reasoning without external validation, our chain-of-thought method explicitly decomposes the planning process into verifiable logical steps, with external verification providing ground-truth feedback. This combination of explicit reasoning decomposition with verified feedback creates a more reliable foundation for enhancing planning capabilities than relying solely on the model’s internal reasoning.

We explore two distinct types of verification feedback: (1) *binary feedback*, which simply indicates whether an action is valid or invalid, and (2) *detailed feedback*, which provides specific reasoning about each action generated by VAL in terms of which preconditions failed or which effects were incorrectly applied. Our hypothesis is that detailed feedback will lead to more robust planning capabilities by providing explicit guidance on the logical errors in the reasoning process.

The verification results provide crucial feedback that guides further instruction tuning. This feedback loop ensures that the model learns not only to generate syntactically correct plans but also to reason about their logical validity. We limit the number of times this feedback loop is used to generate new CoT plans, denoted by  $\eta$ .  $\eta$  is a hyperparameter which we can vary to see how it affects accuracy.

Our PDDL-INSTRUCT approach prioritizes *logical coherence* (see Sec. 3) through its explicit verification of preconditions and effects at each planning step. The verification feedback ensures that each state transition follows logically from the application of a valid action, maintaining strict adherence to the domain rules. However, our approach does not ensure *progressive refinement* (see Sec. 3). This is because rather than optimizing for the shortest or most efficient plan (which would increase mutual information with an optimal solution at each step), we focus on producing satisficing plans that achieve the goal regardless of path length. Generating optimal solutions is a significantly more difficult problem in practice, both for classical planners and for training LLMs to produce them (Ray & Ginsberg, 2008; Domshlak & Nazarenko, 2013).

## 5.2 TRAINING METHODOLOGY FOR PHASE 2 CoT INSTRUCTION TUNING: OPTIMIZATION PROCESS

A distinctive feature of our PDDL-INSTRUCT framework is the two-stage optimization process as part of the CoT Instruction Tuning that explicitly targets both the quality of logical reasoning for CoT and the resulting final planning performance. This approach addresses the unique challenges of symbolic planning by ensuring that the model not only produces correct plans but also develops robust verification capabilities through logical chain-of-thought reasoning. An algorithm for this is available in the supplementary material.

**Stage 1: Reasoning Chain Optimization** In the first stage, we optimize the model parameters  $\theta_t$  to improve the generation of high-quality reasoning chains. Specifically, the model weight in each reasoning step  $r$ ,  $\theta_t^r$  where  $t \in [0, \eta - 1]$ , is updated as Equation 2:

$$\theta_t^r = \theta_t - \delta_1 \nabla_{\theta_t} \mathcal{L}_{\text{reasoning}}(\theta_t, \mathbb{D}_{\text{reasoning}}^t) \quad (2)$$

where  $\mathcal{L}_{\text{reasoning}}$  is a loss function that measures the quality of the generated reasoning chains compared to ideal logical inference sequences,  $\delta_1$  is the learning rate for this stage, and  $\mathbb{D}_{\text{reasoning}}^t$  is the dataset of individual  $\langle s_{i-1}, a_i, s_i \rangle$  triplets along with VAL feedback for them. This objective encourages the model to produce step-by-step reasoning that correctly (i) checks all necessary preconditions before applying actions; (ii) tracks state changes resulting from action effects; (iii) verifies that invariants are maintained throughout the plan; and (iv) detects logical inconsistencies in proposed plans.

The reasoning loss explicitly penalizes logical errors such as applying actions with unsatisfied preconditions, failing to properly propagate effects, or generating steps that violate domain constraints. By focusing specifically on the reasoning process, this stage helps the model develop the logical foundation necessary for robust planning.

**Stage 2: End-Task Performance Optimization** In the second stage, we optimize from the reasoning-improved parameters  $\theta_t^r$  to enhance overall planning:

$$\theta_{t+1} = \theta_t^r - \delta_2 \nabla_{\theta_t^r} \mathcal{L}_{\text{final}}(\theta_t^r, \mathbb{D}_{\text{final}}^t) \quad (3)$$

where  $\mathcal{L}_{\text{final}}$  measures how well the final outputs match the expected answers in the training data,  $\delta_2$  is the learning rate for this stage, and  $\mathbb{D}_{\text{final}}^t$  contains the domain, problem, and plan extracted from CoT output along with VAL feedback specifying if the plan is correct for that problem or not. This second stage ensures that improvements in logical reasoning translate to practical planning capability of producing accurate plans.

This two-stage approach is important as Stage 1 develops the logical foundation needed for planning, while Stage 2 ensures these capabilities are properly applied to generate correct plans. The separation of these objectives allows our framework to balance between teaching fundamental reasoning skills and optimizing for task-specific performance, resulting in models that not only produce correct plans but can also reason about their correctness through explicit logical CoT inference. The exact formulations of the loss functions  $\mathcal{L}_{\text{reasoning}}$  and  $\mathcal{L}_{\text{final}}$  and the specific values of the hyperparameters are discussed in detail in the supplementary material.

### 5.3 EVALUATION PHASE

After completing both the Initial Instruction Tuning and CoT Instruction Tuning phases, the final model is evaluated in the Evaluation Phase (represented on the right side of Fig. 1). In this phase, the instruction-tuned LLM is presented with new, unseen planning domains and problems from  $\mathbb{D}_{\text{test}}$ . The model directly generates complete state-action-state sequences  $\langle s_0, a_1, s_1 \rangle, \dots, \langle s_{n-1}, a_n, s_n \rangle$  that constitute its proposed solution to the planning problem. These generated plans are then evaluated for correctness using VAL, but only for assessment purposes, i.e., no feedback is returned to the model. The plan is considered valid if and only if all actions in the sequence are applicable in their respective states and the final state satisfies all goal conditions.

## 6 EMPIRICAL EVALUATION

We conduct a comprehensive empirical evaluation of PDDL-INSTRUCT to assess its effectiveness in enhancing symbolic planning capabilities in LLMs. Our evaluation leverages PlanBench (Valmeekam et al., 2023b), a standardized benchmark framework for evaluating LLM planning capabilities.

We evaluate PDDL-INSTRUCT using PlanBench to assess its effectiveness in enhancing symbolic planning capabilities in LLMs. Our experiments aim to answer the following research questions:

**RQ1:** Does logical CoT instruction tuning improve plan validity compared to standard approaches?

**RQ2:** How does the quality of feedback (binary vs. detailed) affect planning performance?

**RQ3:** How well does the approach generalize across different planning domains?

**RQ4: How robust are the models to problem complexity? Does performance degrade as it increases?**

We implement PDDL-INSTRUCT using Llama-3-8B, GPT-4<sup>1</sup>, and Gemma-3-270M (Gemma Team et al., 2025) models. We compare against baseline (unmodified models), post phase 1 versions (instruction tuned on planning examples with reasoning of why each plan is valid or invalid), and only phase 2 versions (directly CoT instruction tuned without initial finetuning). For PDDL-INSTRUCT, we test variants with binary feedback (valid/invalid) and detailed feedback (specific reasoning errors generated by VAL), each with the number of feedback iteration loop limit to  $\eta \in \{10, 15\}$ . All experiments were conducted on 2 NVIDIA RTX 3080 GPUs.

**Domains and Problems** PlanBench provides a systematic methodology for evaluating planning capabilities across diverse planning domains and problem complexities. We evaluate across three distinct planning domains from PlanBench, [Blocksworld](#), [Logistics](#), and [Mystery Blocksworld](#), each presenting different reasoning challenges. [More domain details are in the Appendix B.1.](#)

~~**Blocksworld:** The classical planning domain with blocks that can be stacked on a table or on other blocks. This domain primarily tests reasoning with a relatively small action set.~~

~~**Mystery Blocksworld:** A more complex variant of Blocksworld with predicates identical but semantically obfuscated names.~~ An important distinguishing aspect of our evaluation is that we train a single model per architecture (one Llama-3-8B, one GPT-4, one Gemma-3-270M) on training examples from all three domains simultaneously, rather than training separate domain-specific models. This design choice demonstrates that our instruction tuning approach can perform **multi-domain learning**, i.e., the model learns to apply planning reasoning across structurally different domains without requiring domain-specific adaptation or retraining. This capability strengthens our claim that PDDL-INSTRUCT develops generalizable planning reasoning, rather than memorizing domain-specific patterns.

~~**Logistics:** A transportation planning domain where packages must be moved between locations using trucks and airplanes, testing the model’s ability to reason about location connectivity and multi-step transport operations.~~

**Dataset Generation and Splitting** We leverage PlanBench’s problem generators to partition our dataset  $\mathbb{D}$  into three distinct sets,  $\mathbb{D}_1$  (Phase 1 training),  $\mathbb{D}_2$  (Phase 2 training), and  $\mathbb{D}_{\text{test}}$  (evaluation). To create  $\mathbb{D}_1$ , we pair each correct plan with an explanation of its validity, and augment it with an equal number of incorrect plans (generated similarly to the NaturalInstructions framework (Mishra et al., 2022; Wang et al., 2022)) along with explanations of why they fail. We include a plan validator’s output (from VAL) for each plan as part of the explanation. Solution plans are removed from  $\mathbb{D}_2$  and  $\mathbb{D}_{\text{test}}$  to prevent the model from simply memorizing plans during training.

**Evaluation Metrics** Our primary evaluation metric is the Plan Accuracy, measuring the percentage of planning tasks for which the model generates a valid plan that achieves the specified goal. A plan is considered valid only if all actions are applicable in their respective states and the final state satisfies all goal conditions, as verified by VAL. For each domain, we generate 100 test tasks of varying complexity, with problems including different numbers of objects and requiring different plan lengths to solve. [We validated using Fast Downward \(FD\) \(Helmert, 2006\) that all problems are solvable, i.e., FD achieved 100% accuracy on our test problems.](#)

## 7 RESULTS AND DISCUSSION

**Overall Performance (RQ1)** Tab. 1 presents the plan accuracy across models, domains, and approaches. The results clearly demonstrate that PDDL-INSTRUCT significantly outperforms baseline models, models after Phase 1 instruction tuning, and models with just Phase 2 CoT instruction tuning.

For Llama-3, PDDL-INSTRUCT with detailed feedback and  $\eta = 15$  achieves validity rates of 94%, 64%, and 79%, respectively in Blocksworld, Mystery Blocksworld, and Logistics. This

<sup>1</sup>Note that GPT-4 experiments were constrained by limited access.

| Model   | Domain      | Baseline | Only P1 | Only P2     | PDDL-INSTRUCT |             |             |             |
|---------|-------------|----------|---------|-------------|---------------|-------------|-------------|-------------|
|         |             |          |         | Detailed    | Binary        |             | Detailed    |             |
|         |             |          |         | $\eta = 15$ | $\eta = 10$   | $\eta = 15$ | $\eta = 10$ | $\eta = 15$ |
| Llama-3 | Blocksworld | 28%      | 78%     | 72%         | 84%           | 89%         | 91%         | 94%         |
|         | Mystery BW  | 1%       | 32%     | 17%         | 47%           | 49%         | 59%         | 64%         |
|         | Logistics   | 11%      | 23%     | 45%         | 61%           | 72%         | 75%         | 79%         |
| GPT-4   | Blocksworld | 35%      | 41%     | 76%         | 79%           | 84%         | 87%         | 91%         |
|         | Mystery BW  | 3%       | 17%     | 19%         | 39%           | 44%         | 54%         | 59%         |
|         | Logistics   | 6%       | 27%     | 51%         | 64%           | 69%         | 72%         | 78%         |
| Gemma-3 | Blocksworld | 7%       | 12%     | 19%         | 37%           | 39%         | 54%         | 56%         |
|         | Mystery BW  | 0%       | 2%      | 3%          | 22%           | 28%         | 24%         | 28%         |
|         | Logistics   | 2%       | 13%     | 11%         | 18%           | 33%         | 27%         | 43%         |

Table 1: Results for plan accuracy generated for 100 test tasks from each domain. Our approach PDDL-INSTRUCT was evaluated with either binary or detailed feedback. Ablation results are for only Phase 1 (P1), and only Phase 2 (P2) with detailed feedback (as it had the best performance). [For reference, FD achieves 100% accuracy on all domains, establishing an upper bound for comparison.](#)

represents an average absolute improvement of 35% ( $SD = 20\%$ ) over basic instruction tuning, and of 66% ( $SD = 3\%$ ) over the baseline. [Note that the variance in the results here is high as we do not control for problem complexity across the test set. LLMs are known to perform substantially worse on longer-horizon planning problems. When test problems span a range of difficulties, the aggregate accuracy reflects this heterogeneity, resulting in higher SD.](#) Similarly, for GPT-4, PDDL-INSTRUCT with detailed feedback and  $\eta = 15$  achieves validity rates of 91%, 59%, and 78% across the three domains. This represents an average absolute improvement of 48% ( $SD = 5\%$ ) over basic instruction tuning, and of 61% ( $SD = 9\%$ ) over the baseline. For Gemma-3, PDDL-INSTRUCT with detailed feedback and  $\eta = 15$  achieves validity rates of 56%, 28%, and 43% across the three domains respectively. While showing the lowest absolute performance among all models tested, Gemma-3 demonstrates the most dramatic relative improvements. These results show that logical CoT instruction tuning enhances plan accuracy significantly, not only when compared to unmodified foundation models and but more importantly, also when compared to models with only basic instruction tuning. ~~The explicit reasoning about preconditions, effects, and state transitions enables the models to generate accurate plans.~~

**Impact of Feedback Type (RQ2)** Comparing the binary feedback and detailed feedback columns in Tab. 1, we observe that detailed feedback consistently outperforms binary feedback across all domains and models. The pattern holds consistently across all three model architectures. For Llama-3 with  $\eta = 15$ , detailed feedback improves plan accuracy by 5 percentage points in Blocksworld, 15 percentage points in Mystery Blocksworld, and 7 percentage points in Logistics compared to binary feedback. For Gemma-3 with  $\eta = 15$ , detailed feedback provides improvements of 2 percentage points in Blocksworld, 4 percentage points in Mystery Blocksworld, and 16 percentage points in Logistics compared to binary feedback. Note that our training approach, though developed independently, has resemblance with LEPA (Zhang et al., 2025a), which also show that providing specific feedback about why each action fails helps in improving the reasoning capabilities of LLMs.

This pattern confirms our hypothesis that providing specific reasoning errors helps the model develop more robust verification capabilities. The advantage of detailed feedback is particularly pronounced in Mystery Blocksworld, the most complex domain with obfuscated predicates. Additionally, we observe that increasing the iteration limit from  $\eta = 10$  to  $\eta = 15$  yields consistent improvements across all configurations. This observation indicates that the model may converge on valid plans given additional feedback iterations loops, though future experiments with varying  $\eta$  are needed to confirm this. The improvement is more substantial with detailed feedback (averaging 4.3 percentage points across all domains and models) than with binary feedback (averaging 3.3 percentage points), indicating that detailed feedback enables more effective use of additional reasoning iterations.

**Cross-Domain Multi-Domain Generalization (RQ3)** Our results demonstrate significant variations in performance across domains, reflecting their inherent complexity and reasoning challenges.

Both All three models achieve the highest performance on Blocksworld, followed by Logistics, with Mystery Blocksworld proving the most challenging. For Llama-3 with detailed feedback and  $\eta = 15$ , the validity rates are 94% for Blocksworld, 79% for Logistics, and 64% for Mystery Blocksworld. This pattern is consistent across all configurations and models, highlighting the increasing difficulty of domains with hidden predicates and complex state interactions. Notably, while absolute performance varies across domains, the relative improvement from PDDL-INSTRUCT is substantial in all three domains. This suggests that our approach enhances planning capabilities in a domain-general manner, with the logical reasoning framework transferring effectively across different planning scenarios.

All three models achieve the highest performance on Blocksworld, followed by Logistics, with Mystery Blocksworld proving the most challenging. This consistent ordering across different model architectures (Llama-3: 94%/79%/64%, GPT-4: 91%/78%/59%, Gemma-3: 56%/43%/28%) suggests that domain complexity, rather than model-specific biases, drives the performance hierarchy.

**Accuracy Analysis with Plan Length (RQ4)** We analyzed the plan length of the optimal plans generated by FD on 100 test problems for each domain, and used this optimal plan length as a proxy for problem complexity. Table 2 reveals important patterns in how plan length affects model performance across domains and models. On Blocksworld, Llama-3 and GPT-4 maintain consistently high accuracy (67-96%) across all plan lengths, while Gemma consistently underperforms (40-61%). Mystery Blocksworld shows more pronounced degradation with plan length across all models. This suggests semantic obfuscation becomes increasingly problematic for longer-horizon reasoning. For Logistics, while Llama-3 and GPT-4 maintain strong performance on 5-15 step problems, accuracy degrades substantially on longer plans (e.g., 63% at 16-20 steps, 57% at 21-30 steps for Llama-3). Overall, these results confirm that plan length is a significant factor in LLM planning performance, with the effect most pronounced in semantically challenging domains and longest-horizon tasks.

| Model                      | 2-4         | 5-7         | 8-10        | 11-15       | 16-20       | 21-30     | 31+       |
|----------------------------|-------------|-------------|-------------|-------------|-------------|-----------|-----------|
| <b>Blocksworld</b>         |             |             |             |             |             |           |           |
| Llama-3                    | 17/18 (94%) | 54/56 (96%) | 21/23 (91%) | 2/3 (67%)   |             |           |           |
| GPT-4                      | 17/18 (94%) | 52/56 (93%) | 20/23 (87%) | 2/3 (67%)   |             |           |           |
| Gemma                      | 11/18 (61%) | 32/56 (57%) | 12/23 (52%) | 1/3 (40%)   |             |           |           |
| <b>Mystery Blocksworld</b> |             |             |             |             |             |           |           |
| Llama-3                    | 16/22 (73%) | 34/49 (69%) | 12/24 (50%) | 2/5 (40%)   |             |           |           |
| GPT-4                      | 16/22 (73%) | 31/49 (63%) | 10/24 (42%) | 2/5 (40%)   |             |           |           |
| Gemma                      | 8/22 (36%)  | 13/49 (27%) | 6/24 (25%)  | 1/5 (20%)   |             |           |           |
| <b>Logistics</b>           |             |             |             |             |             |           |           |
| Llama-3                    |             | 21/24 (88%) | 24/26 (92%) | 20/25 (80%) | 10/16 (63%) | 4/7 (57%) | 0/2 (0%)  |
| GPT-4                      |             | 21/24 (88%) | 23/26 (88%) | 20/25 (80%) | 9/16 (56%)  | 4/7 (57%) | 1/2 (50%) |
| Gemma                      |             | 11/24 (46%) | 15/26 (58%) | 9/25 (36%)  | 6/16 (38%)  | 2/7 (29%) | 0/2 (0%)  |

Table 2: Plan accuracy by plan length of optimal plans generated by FD across all three models with PDDL-INSTRUCT (detailed feedback,  $\eta=15$ ). Results show (solved/total) problems (percentage).

## 8 CONCLUSION

We have presented PDDL-INSTRUCT, a novel framework that significantly enhances the symbolic planning capabilities of Large Language Models through logical chain-of-thought instruction tuning. By decomposing the planning process into verifiable logical reasoning chains and providing explicit verification feedback, our approach enables LLMs to generate valid plans with unprecedented reliability across diverse planning domains. While our results are promising, we note that our approach does not achieve 100% accuracy across all domains. However, when combined with frameworks like LLM-Modulo (Kambhampati et al., 2024), which provides efficient mechanisms for integrating external tools with LLMs, our method could significantly reduce PDDL-INSTRUCT substantially reduces the number of required-feedback loops with the verifier. This integration would make the planning process more efficient by allowing the model to leverage its enhanced reasoning capabilities while still benefiting from formal verification when needed.

ultimately resulting in faster and more reliable planning. Our empirical analysis (Appendix D.4) shows that PDDL-INSTRUCT-trained models require  $3.6\text{--}7.1\times$  fewer iterations to generate valid plans compared to baseline models for Llama-3 and GPT-4, directly translating to reduced latency and computational cost in the Generate-Test-Critique loop. This integration enables a practical path toward reliable LLM-based planning by enabling models to generate high-quality candidates requiring minimal external verification, combining the reasoning flexibility of LLMs with the formal guarantees of symbolic verification.

A notable advantage of our VAL-based verification approach is its robustness against unfaithful chain-of-thought reasoning as described by Lyu et al. (2023). While traditional CoT methods can generate plausible-sounding but internally inconsistent reasoning chains, our external verification ensures that each logical step is formally validated against the planning domain’s constraints.

**Limitations and Future Work** While our results highlight the effectiveness of combining logical chain-of-thought with verification-guided feedback, several promising directions remain for future:

*Optimizing instruction tuning data:* We can further refine our approach by applying instruction optimization techniques as described in Lee et al. (2024) to identify the most effective subset of instruction examples. Determining which planning scenarios and error types provide the most informative learning signal could significantly improve training efficiency.

*Expanding PDDL Coverage:* To simplify the logical reasoning effort, we currently limit to use only a subset of PDDL features. Future work could address this limitation and incorporate more advanced PDDL features such as conditional effects, derived predicates, action costs, and temporal constraints, gradually expanding the expressive power of the planning capabilities.

*Self-Verification Capabilities:* While we currently rely on an external verifier (VAL), an intriguing direction is developing self-verification capabilities where models learn to accurately critique their own plans. As LLMs continue to improve, reducing or eliminating dependence on external verifiers could make planning more autonomous and efficient.

*Dynamic Iteration Control:* ~~Our current approach uses~~ While we currently use fixed iteration limits ( $\eta$ ). ~~Developing techniques,~~ developing methods to dynamically determine the optimal number of iterations  $\eta$  based on problem complexity or feedback patterns could improve efficiency, especially as we hypothesize that ~~return~~ returns will diminish on increasing  $\eta$  beyond ~~certain values~~ a limit.

*Expanding Domain Coverage:* Currently PlanBench supports 3 domains we used in this work. Extending the evaluation to include a wider variety of planning domains would enable more comprehensive evaluation and potentially reveal new opportunities for improving logical reasoning in planning.

*Beyond Planning:* Finally, the logical reasoning framework developed in this work could extend beyond planning to other sequential decision-making tasks that require long-horizon reasoning, such as theorem proving, complex puzzle solving, and multi-step logical deduction. The combination of chain-of-thought reasoning with verification-guided feedback appears to be a powerful paradigm that could enhance LLM capabilities across diverse reasoning tasks.

## REFERENCES

- Janice Ahn, Rishu Verma, Renze Lou, Di Liu, Rui Zhang, and Wenpeng Yin. Large language models for mathematical reasoning: Progresses and challenges. In *Proceedings of the 18th Conference of the European Chapter of the Association for Computational Linguistics: Student Research Workshop (EACL)*, 2024.
- Michael Ahn, Anthony Brohan, Noah Brown, Yevgen Chebotar, Omar Cortes, Byron David, Chelsea Finn, Chuyuan Fu, Keerthana Gopalakrishnan, Karol Hausman, et al. Do as I can, not as I say: Grounding language in robotic affordances. In *Proceedings of the 6th Conference on Robot Learning (CoRL)*, 2022.
- Jicong Ao, Fan Wu, Yansong Wu, Abdalla Swiki, and Sami Haddadin. LLM-as-BT-Planner: Leveraging LLMs for behavior tree generation in robot task planning. In *Proceedings of the 2025 IEEE International Conference on Robotics and Automation (ICRA)*, 2025.

- 594 Tom Bylander. Complexity results for planning. In *Proceedings of the 12th International Joint*  
595 *Conference on Artificial Intelligence (IJCAI)*, 1991.
- 596
- 597 Dillon Z. Chen, Pulkit Verma, Siddharth Srivastava, Michael Katz, and Sylvie Thiébaux. AI planning:  
598 A primer and survey (Preliminary report). In *AAAI 2025 Workshop on Bridging the Gap Between*  
599 *AI Planning and Reinforcement Learning (PRL)*, 2025a.
- 600
- 601 Dillon Ze Chen, Johannes Zenn, Tristan Cinquin, and Sheila A. McIlraith. Language models  
602 for PDDL planning: Generating sound and programmatic policies. In *RLC 2025 Workshop on*  
603 *Programmatic Reinforcement Learning*, 2025b.
- 604
- 605 Yongchao Chen, Yilun Hao, Yang Zhang, and Chuchu Fan. Code-as-symbolic-planner: Foundation  
606 model-based robot planning via symbolic code generation. *arXiv preprint arXiv:2503.01700*,  
2025c.
- 607
- 608 Haotian Chi, Zeyu Feng, Yueming Lyu, Chengqi Zheng, Linbo Luo, Yew-Soon Ong, Ivor Tsang,  
609 Hechang Chen, Yi Chang, and Haiyan Yin. InstructFlow: Adaptive symbolic constraint-guided  
610 code generation for long-horizon planning. In *Proceedings of the 39th Conference on Advances in*  
611 *Neural Information Processing Systems (NeurIPS)*, 2025. (to appear).
- 612
- 613 Augusto B Corrêa, André G Pereira, and Jendrik Seipp. Classical planning with LLM-generated  
614 heuristics: Challenging the state of the art with python code. In *Proceedings of the 39th Conference*  
615 *on Advances in Neural Information Processing Systems (NeurIPS)*, 2025. (to appear).
- 616
- 617 Carmel Domshlak and Anton Nazarenko. The complexity of optimal monotonic planning: The bad,  
618 the good, and the causal graph. *Journal of Artificial Intelligence Research*, 48:783–812, 2013.
- 619
- 620 Chengyu Du, Jinyi Han, Yizhou Ying, Aili Chen, Qianyu He, Haokun Zhao, Haoran Guo, Sirui  
621 Xia, Jiaqing Liang, Zulong Chen, Liangyue Li, and Yanghua Xiao. Think thrice before you act:  
622 Progressive thought refinement in large language models. In *Proceedings of the 13th International*  
623 *Conference on Learning Representations (ICLR)*, 2025.
- 624
- 625 Richard E. Fikes and Nils J. Nilsson. STRIPS: A new approach to the application of theorem proving  
626 to problem solving. *Artificial Intelligence*, 2(3-4):189–208, 1971.
- 627
- 628 Dayuan Fu, Keqing He, Yejie Wang, Wentao Hong, Zhuoma GongQue, Weihao Zeng, Wei Wang,  
629 Jingang Wang, Xunliang Cai, and Weiran Xu. AgentRefine: Enhancing agent generalization  
630 through refinement tuning. In *Proceedings of the 13th International Conference on Learning*  
631 *Representations (ICLR)*, 2025.
- 632
- 633 Hector Geffner and Blai Bonet. *A Concise Introduction to Models and Methods for Automated*  
634 *Planning: Synthesis Lectures on Artificial Intelligence and Machine Learning*. Morgan & Claypool  
635 Publishers, 1st edition, 2013. ISBN 1608459691.
- 636
- 637 Gemini Team, Rohan Anil, Sebastian Borgeaud, Jean-Baptiste Alayrac, Jiahui Yu, Radu Soricut,  
638 Johan Schalkwyk, Andrew M Dai, Anja Hauth, Katie Millican, et al. Gemini: A family of highly  
639 capable multimodal models. *arXiv preprint arXiv:2312.11805*, 2023.
- 640
- 641 Gemma Team, Aishwarya Kamath, Johan Ferret, Shreya Pathak, Nino Vieillard, Ramona Merhej,  
642 Sarah Perrin, Tatiana Matejovicova, Alexandre Ramé, Morgane Rivièrè, et al. Gemma 3 technical  
643 report. *arXiv preprint arXiv:2503.19786*, 2025.
- 644
- 645 Elliot Gestrin, Marco Kuhlmann, and Jendrik Seipp. Towards robust LLM-driven planning from  
646 minimal text descriptions. In *ICAPS 2024 Workshop on Human Aware and Explainable Planning*  
647 *(HAXP)*, 2024.
- 648
- 649 Lin Guan, Karthik Valmeekam, Sarath Sreedharan, and Subbarao Kambhampati. Leveraging pre-  
650 trained large language models to construct and utilize world models for model-based task planning.  
651 In *Proceedings of the 37th Conference on Advances in Neural Information Processing Systems*  
652 *(NeurIPS)*, 2023.

- 648 Yilun Hao, Yongchao Chen, Yang Zhang, and Chuchu Fan. Large language models can solve real-  
649 world planning rigorously with formal verification tools. In *Proceedings of the 2025 Conference of*  
650 *the Nations of the Americas Chapter of the Association for Computational Linguistics: Human*  
651 *Language Technologies (NAACL)*, 2025a.
- 652 Yilun Hao, Yang Zhang, and Chuchu Fan. Planning anything with rigor: General-purpose zero-shot  
653 planning with LLM-based formalized programming. In *Proceedings of the 13th International*  
654 *Conference on Learning Representations (ICLR)*, 2025b.
- 655 Malte Helmert. The fast downward planning system. *Journal of Artificial Intelligence Research*, 26:  
656 191–246, 2006.
- 657 Richard Howey, Derek Long, and Maria Fox. VAL: Automatic plan validation, continuous effects and  
658 mixed initiative planning using PDDL. In *Proceedings of the 16th IEEE International Conference*  
659 *on Tools with Artificial Intelligence (ICTAI)*, 2004.
- 660 Vincent Hsiao, Morgan Fine-Morris, Mark Roberts, Leslie N Smith, and Laura M. Hiatt. A critical  
661 assessment of LLMs for solving multi-step problems: Preliminary results. In *AAAI 2025 Workshop*  
662 *on Planning in the Era of LLMs (LM4Plan)*, 2025.
- 663 Zichao Hu, Junyi Jessy Li, Arjun Guha, and Joydeep Biswas. Robo-Instruct: Simulator-augmented  
664 instruction alignment for finetuning code LLMs. In *Proceedings of the 2nd Conference on*  
665 *Language Modeling (CoLM)*, 2025.
- 666 Jie Huang, Xinyun Chen, Swaroop Mishra, Huaixiu Steven Zheng, Adams Wei Yu, Xinying Song,  
667 and Denny Zhou. Large language models cannot self-correct reasoning yet. In *Proceedings of the*  
668 *12th International Conference on Learning Representations (ICLR)*, 2024.
- 669 Sukai Huang, Trevor Cohn, and Nir Lipovetzky. Chasing progress, not perfection: Revisiting  
670 strategies for end-to-end LLM plan generation. *Proceedings of the 35th International Conference*  
671 *on Automated Planning and Scheduling (ICAPS)*, 2025a.
- 672 Sukai Huang, Nir Lipovetzky, and Trevor Cohn. Planning in the dark: LLM-symbolic planning  
673 pipeline without experts. In *AAAI 2025 Workshop on Planning in the Era of LLMs (LM4Plan)*,  
674 2025b.
- 675 Wenlong Huang, Fei Xia, Ted Xiao, Harris Chan, Jacky Liang, Pete Florence, Andy Zeng, Jonathan  
676 Tompson, Igor Mordatch, Yevgen Chebotar, Pierre Sermanet, Tomas Jackson, Noah Brown, Linda  
677 Luu, Sergey Levine, Karol Hausman, and Brian Ichter. Inner monologue: Embodied reasoning  
678 through planning with language models. In *Proceedings of the 6th Annual Conference on Robot*  
679 *Learning (CoRL)*, 2022.
- 680 Shima Imani, Liang Du, and Harsh Shrivastava. MathPrompter: Mathematical reasoning using  
681 large language models. In *Proceedings of the 61st Annual Meeting of the Association for*  
682 *Computational Linguistics (ACL)*, 2023.
- 683 Riccardo Andrea Izzo, Gianluca Bardaro, and Matteo Matteucci. BTGenBot: behavior tree generation  
684 for robotic tasks with lightweight LLMs. In *Proceedings of the 2024 IEEE/RSJ International*  
685 *Conference on Intelligent Robots and Systems (IROS)*, 2024.
- 686 Sumit Kumar Jha, Susmit Jha, Patrick Lincoln, Nathaniel D Bastian, Alvaro Velasquez, Rickard  
687 Ewetz, and Sandeep Neema. Neuro symbolic reasoning for planning: Counterexample guided  
688 inductive synthesis using large language models and satisfiability solving. *arXiv preprint*  
689 *arXiv:2309.16436*, 2023.
- 690 Subbarao Kambhampati, Karthik Valmееkam, Lin Guan, Mudit Verma, Kaya Stechly, Siddhant  
691 Bhabri, Lucas Paul Saldyt, and Anil B Murthy. Position: LLMs can’t plan, but can help planning  
692 in LLM-Modulo frameworks. In *Proceedings of the 41th International Conference on Machine*  
693 *Learning (ICML)*, 2024.
- 694 Takeshi Kojima, Shixiang Shane Gu, Machel Reid, Yutaka Matsuo, and Yusuke Iwasawa. Large  
695 language models are zero-shot reasoners. *Proceedings of the 36th Conference on Advances in*  
696 *Neural Information Processing Systems (NeurIPS)*, 2022.

- 702 Harsha Kokel, Michael Katz, Kavitha Srinivas, and Shirin Sohrabi. ACPBench: Reasoning about  
703 action, change, and planning. In *Proceedings of the 39th AAAI Conference on Artificial Intelligence*  
704 *(AAAI)*, 2025a.
- 705  
706 Harsha Kokel, Michael Katz, Kavitha Srinivas, and Shirin Sohrabi. ACPBench Hard: Unrestrained  
707 reasoning about action, change, and planning. In *AAAI 2025 Workshop on Planning in the Era of*  
708 *LLMs (LM4Plan)*, 2025b.
- 709  
710 Nathan Lambert, Jacob Morrison, Valentina Pyatkin, Shengyi Huang, Hamish Ivison, Faeze Brahman,  
711 Lester James Validad Miranda, Alisa Liu, Nouha Dziri, Xinxu Lyu, Yuling Gu, Saumya Malik,  
712 Victoria Graf, Jena D. Hwang, Jiangjiang Yang, Ronan Le Bras, Oyvind Tafjord, Christopher  
713 Wilhelm, Luca Soldaini, Noah A. Smith, Yizhong Wang, Pradeep Dasigi, and Hannaneh Hajishirzi.  
714 Tulu 3: Pushing frontiers in open language model post-training. In *Proceedings of the 2nd*  
715 *Conference on Language Modeling (COLM)*, 2025.
- 716  
717 Changho Lee, Janghoon Han, Seonghyeon Ye, Stanley Jungkyu Choi, Honglak Lee, and Kyunghoon  
718 Bae. Instruction matters: A simple yet effective task selection for optimized instruction tuning of  
719 specific tasks. In *Proceedings of the 2024 Conference on Empirical Methods in Natural Language*  
720 *Processing (EMNLP)*, 2024.
- 721  
722 Wenjun Li, Changyu Chen, and Pradeep Varakantham. Unlocking the planning capabilities of  
723 large language models with maximum diversity fine-tuning. In *Findings of the Association for*  
724 *Computational Linguistics: NAACL 2025*, 2025.
- 725  
726 Jacky Liang, Wenlong Huang, Fei Xia, Peng Xu, Karol Hausman, Brian Ichter, Pete Florence, and  
727 Andy Zeng. Code as policies: Language model programs for embodied control. In *2023 IEEE*  
728 *International Conference on Robotics and Automation (ICRA)*, 2023.
- 729  
730 Bo Liu, Yuqian Jiang, Xiaohan Zhang, Qiang Liu, Shiqi Zhang, Joydeep Biswas, and Peter Stone.  
731 LLM+P: Empowering large language models with optimal planning proficiency. *arXiv preprint*  
732 *arXiv:2304.11477*, 2023.
- 733  
734 Fei Liu, Xialiang Tong, Mingxuan Yuan, Xi Lin, Fu Luo, Zhenkun Wang, Zhichao Lu, and Qingfu  
735 Zhang. Evolution of heuristics: Towards efficient automatic algorithm design using large language  
736 model. In *Proceedings of the 41st International Conference on Machine Learning (ICML)*, 2024.
- 737  
738 Shayne Longpre, Le Hou, Tu Vu, Albert Webson, Hyung Won Chung, Yi Tay, Denny Zhou, Quoc V.  
739 Le, Barret Zoph, Jason Wei, and Adam Roberts. The flan collection: designing data and methods  
740 for effective instruction tuning. In *Proceedings of the 40th International Conference on Machine*  
741 *Learning (ICML)*, 2023.
- 742  
743 Qing Lyu, Shreya Havaldar, Adam Stein, Li Zhang, Delip Rao, Eric Wong, Marianna Apidianaki, and  
744 Chris Callison-Burch. Faithful chain-of-thought reasoning. In *Proceedings of the 13th International*  
745 *Joint Conference on Natural Language Processing and the 3rd Conference of the Asia-Pacific*  
746 *Chapter of the Association for Computational Linguistics (IJCNLP-AAACL 2023)*, 2023.
- 747  
748 Sadeqh Mahdavi, Raquel Aoki, Keyi Tang, and Yanshuai Cao. Leveraging environment interaction  
749 for automated PDDL translation and planning with large language models. In *Proceedings of the*  
750 *38th Conference on Neural Information Processing Systems (NeurIPS)*, 2024.
- 751  
752 Kumar Manas, Stefan Zwicklbauer, and Adrian Paschke. CoT-TL: Low-resource temporal knowledge  
753 representation of planning instructions using chain-of-thought reasoning. In *2024 IEEE/RSJ*  
754 *International Conference on Intelligent Robots and Systems (IROS)*, pp. 9636–9643. IEEE, 2024.
- 755  
756 Drew McDermott, Malik Ghallab, Adele Howe, Craig Knoblock, A. Ram, Manuela Veloso, Daniel S.  
757 Weld, and David Wilkins. PDDL – The Planning Domain Definition Language. Technical Report  
758 CVC TR-98-003/DCS TR-1165, Yale Center for Computational Vision and Control, 1998.
- 759  
760 Swaroop Mishra, Daniel Khashabi, Chitta Baral, and Hannaneh Hajishirzi. Cross-task generalization  
761 via natural language crowdsourcing instructions. In *Proceedings of the 60th Annual Meeting of the*  
762 *Association for Computational Linguistics (ACL)*, 2022.

- 756 Ida Momennejad, Hosein Hasanbeig, Felipe Vieira Frujeri, Hiteshi Sharma, Nebojsa Jojic, Hamid  
757 Palangi, Robert Ness, and Jonathan Larson. Evaluating cognitive maps and planning in large  
758 language models with cogeval. In *Proceedings of the 37th Conference on Advances in Neural  
759 Information Processing Systems (NeurIPS)*, 2023.
- 760  
761 Erik Nijkamp, Bo Pang, Hiroaki Hayashi, Lifu Tu, Huan Wang, Yingbo Zhou, Silvio Savarese, and  
762 Caiming Xiong. CodeGen: An open large language model for code with multi-turn program  
763 synthesis. In *Proceedings of the 11th International Conference on Learning Representations  
764 (ICLR)*, 2023.
- 765  
766 OpenAI, Josh Achiam, Steven Adler, Sandhini Agarwal, Lama Ahmad, Ilge Akkaya, Florencia Leoni  
767 Aleman, Diogo Almeida, Janko Altmenschmidt, Sam Altman, Shyamal Anadkat, et al. GPT-4  
768 technical report. *arXiv preprint arXiv:2303.08774*, 2023.
- 769  
770 Long Ouyang, Jeff Wu, Xu Jiang, Diogo Almeida, Carroll L. Wainwright, Pamela Mishkin, Chong  
771 Zhang, Sandhini Agarwal, Katarina Slama, Alex Ray, John Schulman, Jacob Hilton, Fraser Kelton,  
772 Luke Miller, Maddie Simens, Amanda Askell, Peter Welinder, Paul Christiano, Jan Leike, and  
773 Ryan Lowe. Training language models to follow instructions with human feedback. In *Proceedings  
774 of the 36th Conference on Advances in Neural Information Processing Systems (NeurIPS)*, 2022.
- 775  
776 Vishal Pallagani, Bharath Muppasani, Biplav Srivastava, Francesca Rossi, Lior Horesh, Keerthiram  
777 Murugesan, Andrea Loreggia, Francesco Fabiano, Rony Joseph, and Yathin Kethepalli. Plansformer  
778 tool: Demonstrating generation of symbolic plans using transformers. In *Proceedings of the 32nd  
779 International Joint Conference on Artificial Intelligence (IJCAI)*, 2023. Demo Track.
- 780  
781 Vishal Pallagani, Bharath Chandra Muppasani, Kaushik Roy, Francesco Fabiano, Andrea Loreggia,  
782 Keerthiram Murugesan, Biplav Srivastava, Francesca Rossi, Lior Horesh, and Amit Sheth. On the  
783 prospects of incorporating large language models (LLMs) in automated planning and scheduling  
(APS). In *Proceedings of the 34th International Conference on Automated Planning and Scheduling  
(ICAPS)*, 2024.
- 784  
785 Baolin Peng, Chunyuan Li, Pengcheng He, Michel Galley, and Jianfeng Gao. Instruction tuning with  
786 GPT-4. *arXiv preprint arXiv:2304.03277*, 2023.
- 787  
788 Katrina Ray and Matthew L Ginsberg. The complexity of optimal planning and a more efficient  
789 method for finding solutions. In *Proceedings of the 18th International Conference on Automated  
790 Planning and Scheduling (ICAPS)*, 2008.
- 791  
792 Bernardino Romera-Paredes, Mohammadamin Barekatin, Alexander Novikov, Matej Balog,  
793 M Pawan Kumar, Emilien Dupont, Francisco J R Ruiz, Jordan S. Ellenberg, Pengming Wang, Omar  
794 Fawzi, Pushmeet Kohli, Alhussein Fawzi, Josh Grochow, Andrea Lodi, Jean-Baptiste Mouret,  
795 Talia Ringer, and Tao Yu. Mathematical discoveries from program search with large language  
796 models. *Nature*, 625:468 – 475, 2023.
- 797  
798 Victor Sanh, Albert Webson, Colin Raffel, Stephen Bach, Lintang Sutawika, Zaid Alyafeai, Antoine  
799 Chaffin, Arnaud Stiegler, Arun Raja, Manan Dey, M Saiful Bari, Canwen Xu, Urmish Thakker,  
800 Shanya Sharma Sharma, Eliza Szczechla, Taewoon Kim, Gunjan Chhablani, Nihal Nayak, De-  
801 bajyoti Datta, Jonathan Chang, Mike Tian-Jian Jiang, Han Wang, Matteo Manica, Sheng Shen,  
802 Zheng Xin Yong, Harshit Pandey, Rachel Bawden, Thomas Wang, Trishala Neeraj, Jos Rozen,  
803 Abheesh Sharma, Andrea Santilli, Thibault Fevry, Jason Alan Fries, Ryan Teehan, Teven Le Scao,  
804 Stella Biderman, Leo Gao, Thomas Wolf, and Alexander M Rush. Multitask prompted training  
enables zero-shot task generalization. In *Proceedings of the 10th International Conference on  
Learning Representations (ICLR)*, 2022.
- 805  
806 Jendrik Seipp, Álvaro Torralba, and Jörg Hoffmann. PDDL generators. <https://doi.org/10.5281/zenodo.6382173>, 2022.
- 807  
808 Eliezer Shlomi, Guy Azran, Eilam Shapira, Omer Nahum, Roi Reichart, Guy Uziel, Michael Katz,  
809 Ateret Anaby Tavor, and Sarah Keren. Transition function prediction in AI planning using LLMs.  
In *AAAI 2025 Workshop on Planning in the Era of LLMs (LM4Plan)*, 2025.

- 810 Tom Silver, Soham Dan, Kavitha Srinivas, Joshua B Tenenbaum, Leslie Kaelbling, and Michael Katz.  
811 Generalized planning in PDDL domains with pretrained large language models. In *Proceedings of*  
812 *the 38th AAAI Conference on Artificial Intelligence (AAAI)*, 2024.
- 813  
814 Ishika Singh, Valts Blukis, Arsalan Mousavian, Ankit Goyal, Danfei Xu, Jonathan Tremblay, Dieter  
815 Fox, Jesse Thomason, and Animesh Garg. ProgPrompt: Generating situated robot task plans  
816 using large language models. In *2023 IEEE International Conference on Robotics and Automation*  
817 *(ICRA)*, 2023.
- 818 Chan Hee Song, Jiaman Wu, Clayton Washington, Brian M Sadler, Wei-Lun Chao, and Yu Su.  
819 LLM-Planner: Few-shot grounded planning for embodied agents with large language models. In  
820 *Proceedings of the IEEE/CVF International Conference on Computer Vision (ICCV)*, 2023.
- 821  
822 Kaya Stechly, Matthew Marquez, and Subbarao Kambhampati. GPT-4 doesn't know it's wrong: An  
823 analysis of iterative prompting for reasoning problems. In *NeurIPS 2023 Workshop on Foundation*  
824 *Models for Decision Making (FMDM)*, 2023.
- 825 Kaya Stechly, Karthik Valmeekam, and Subbarao Kambhampati. Chain of thoughtlessness? An  
826 analysis of CoT in planning. In *Proceedings of the 38th Conference on Advances in Neural*  
827 *Information Processing Systems (NeurIPS)*, 2024.
- 828  
829 Kaya Stechly, Karthik Valmeekam, and Subbarao Kambhampati. On the self-verification limitations  
830 of large language models on reasoning and planning tasks. In *Proceedings of the 13th International*  
831 *Conference on Learning Representations (ICLR)*, 2025.
- 832 Katharina Stein, Daniel Fišer, Jörg Hoffmann, and Alexander Koller. Automating the generation of  
833 prompts for LLM-based action choice in PDDL planning. In *Proceedings of the 35th International*  
834 *Conference on Automated Planning and Scheduling (ICAPS)*, 2025.
- 835  
836 Haotian Sun, Yuchen Zhuang, Lingkai Kong, Bo Dai, and Chao Zhang. AdaPlanner: adaptive  
837 planning from feedback with language models. In *Proceedings of the 37th International Conference*  
838 *on Neural Information Processing Systems (NeurIPS)*, 2023.
- 839 Marcus Tantakoun, Xiaodan Zhu, and Christian Muise. LLMs as planning modelers: A survey  
840 for leveraging large language models to construct automated planning models. In *AAAI 2025*  
841 *Workshop on Planning in the Era of LLMs (LM4Plan)*, 2025.
- 842  
843 Hugo Touvron, Thibaut Lavril, Gautier Izacard, Xavier Martinet, Marie-Anne Lachaux, Timothée  
844 Lacroix, Baptiste Rozière, Naman Goyal, Eric Hambro, Faisal Azhar, et al. LLaMA: Open and  
845 efficient foundation language models. *arXiv preprint arXiv:2302.13971*, 2023.
- 846 Karthik Valmeekam, Matthew Marquez, and Subbarao Kambhampati. Can large language models  
847 really improve by self-critiquing their own plans? In *NeurIPS 2023 Workshop on Foundation*  
848 *Models for Decision Making (FMDM)*, 2023a.
- 849  
850 Karthik Valmeekam, Matthew Marquez, Alberto Olmo, Sarath Sreedharan, and Subbarao Kambham-  
851 pati. PlanBench: An extensible benchmark for evaluating large language models on planning and  
852 reasoning about change. In *Proceedings of the 37th Conference on Advances in Neural Information*  
853 *Processing Systems (NeurIPS)*, 2023b.
- 854 Karthik Valmeekam, Matthew Marquez, Sarath Sreedharan, and Subbarao Kambhampati. On the  
855 planning abilities of large language models - A critical investigation. In *Proceedings of the 37th*  
856 *Conference on Advances in Neural Information Processing Systems (NeurIPS)*, 2023c.
- 857  
858 Evan Z Wang, Federico Cassano, Catherine Wu, Yunfeng Bai, William Song, Vaskar Nath, Ziwen  
859 Han, Sean M. Hendryx, Summer Yue, and Hugh Zhang. Planning in natural language improves  
860 LLM search for code generation. In *Proceedings of the 13th International Conference on Learning*  
861 *Representations (ICLR)*, 2025.
- 862 Guanzhi Wang, Yuqi Xie, Yunfan Jiang, Ajay Mandlekar, Chaowei Xiao, Yuke Zhu, Linxi Fan,  
863 and Anima Anandkumar. Voyager: An open-ended embodied agent with large language models.  
*Transactions on Machine Learning Research*, 2024. ISSN 2835-8856.

- 864 Yizhong Wang, Swaroop Mishra, Pegah Alipoormolabashi, Yeganeh Kordi, Amirreza Mirzaei,  
865 Atharva Naik, Arjun Ashok, Arut Selvan Dhanasekaran, Anjana Arunkumar, David Stap, Eshaan  
866 Pathak, Giannis Karamanolakis, Haizhi Lai, Ishan Purohit, Ishani Mondal, Jacob Anderson,  
867 Kirby Kuznia, Krma Doshi, Kuntal Kumar Pal, Maitreya Patel, Mehrad Moradshahi, Mihir  
868 Parmar, Mirali Purohit, Neeraj Varshney, Phani Rohitha Kaza, Pulkit Verma, Ravsehaj Singh Puri,  
869 Rushang Karia, Savan Doshi, Shailaja Keyur Sampat, Siddhartha Mishra, Sujan Reddy A, Sumanta  
870 Patro, Tanay Dixit, and Xudong Shen. Super-NaturalInstructions: Generalization via declarative  
871 instructions on 1600+ NLP tasks. In *Proceedings of the 2022 Conference on Empirical Methods in  
872 Natural Language Processing (EMNLP)*, 2022.
- 873 Zihao Wang, Shaofei Cai, Guanzhou Chen, Anji Liu, Xiaojian Ma, and Yitao Liang. Describe,  
874 explain, plan and select: Interactive planning with LLMs enables open-world multi-task agents.  
875 In *Proceedings of the 37th Conference on Advances in Neural Information Processing Systems  
876 (NeurIPS)*, 2023.
- 877 Jason Wei, Maarten Bosma, Vincent Zhao, Kelvin Guu, Adams Wei Yu, Brian Lester, Nan Du,  
878 Andrew M. Dai, and Quoc V Le. Finetuned language models are zero-shot learners. In *Proceedings  
879 of the 10th International Conference on Learning Representations (ICLR)*, 2022a.
- 880 Jason Wei, Xuezhi Wang, Dale Schuurmans, Maarten Bosma, Brian Ichter, Fei Xia, Ed H. Chi,  
881 Quoc V. Le, and Denny Zhou. Chain-of-thought prompting elicits reasoning in large language  
882 models. In *Proceedings of the 36th Conference on Advances in Neural Information Processing  
883 Systems (NeurIPS)*, 2022b.
- 884 Yaqi Xie, Chen Yu, Tongyao Zhu, Jinbin Bai, Ze Gong, and Harold Soh. Translating natural language  
885 to planning goals with large-language models. *arXiv preprint arXiv:2302.05128*, 2023.
- 886 Eric Zelikman, Yuhuai Wu, Jesse Mu, and Noah Goodman. STaR: Bootstrapping reasoning with  
887 reasoning. In *Proceedings of the 36th Conference on Advances in Neural Information Processing  
888 Systems (NeurIPS)*, 2022.
- 889 Jin Zhang, Flood Sung, Zhilin Yang, Yang Gao, and Chongjie Zhang. Learning to plan before  
890 answering: Self-teaching LLMs to learn abstract plans for problem solving. In *Proceedings of the  
891 13th International Conference on Learning Representations (ICLR)*, 2025a.
- 892 Xiaopan Zhang, Hao Qin, Fuquan Wang, Yue Dong, and Jiachen Li. LaMMA-P: Generalizable  
893 multi-agent long-horizon task allocation and planning with LM-driven PDDL planner. In *2025  
894 IEEE International Conference on Robotics and Automation (ICRA)*, 2025b.
- 895 Zirui Zhao, Wee Sun Lee, and David Hsu. Large language models as commonsense knowledge for  
896 large-scale task planning. *Proceedings of the 37th Conference on Advances in Neural Information  
897 Processing Systems (NeurIPS)*, 2023.
- 901 Haotian Zhou, Yunhan Lin, Longwu Yan, Jihong Zhu, and Huasong Min. LLM-BT: performing  
902 robotic adaptive tasks based on large language models and behavior trees. In *Proceedings of the  
903 2024 IEEE International Conference on Robotics and Automation (ICRA)*, 2024a.
- 904 Zhehua Zhou, Jiayang Song, Kunpeng Yao, Zhan Shu, and Lei Ma. ISR-LLM: Iterative self-refined  
905 large language model for long-horizon sequential task planning. In *2024 IEEE International  
906 Conference on Robotics and Automation (ICRA)*, 2024b.
- 907  
908  
909  
910  
911  
912  
913  
914  
915  
916  
917

## A EXTENDED LITERATURE REVIEW

**LLMs and Planning** The current limited reasoning capabilities of LLMs for planning have been evaluated in several ways. The ACPBench benchmark (Kokel et al., 2025a), and the more recent ACPBench-Hard one (Kokel et al., 2025b), evaluate several state-of-the-art LLMs of varying size on reasoning tasks related to planning. These results indicate that all models, even the largest ones, underperform and have a very long way to go before they can be reliably used for planning. In Huang et al. (2025a), various strategies to enhance the reasoning capabilities of the models for planning are evaluated. They find that reward-driven RL optimization is promising and that only finetuning on datasets of problems and reference plans is insufficient. In our work, we go beyond simple finetuning by doing logical chain-of-thought instruction tuning.

Another approach consists in using LLMs to generate automated planning models (e.g. PDDL domain and problem) and to rely on existing symbolic solvers to produce sound solutions. This hybrid paradigm has received a lot of interest (Huang et al., 2025b; Mahdavi et al., 2024; Zhang et al., 2025b; Tantakoun et al., 2025). Still, generating such structured models accurately is challenging for LLMs. To reach high accuracy, the process usually relies on human interventions for feedback and validation (Guan et al., 2023), using external verifiers (Silver et al., 2024; Hao et al., 2025a), or focuses on limited aspects of the problem (e.g. only generating planning goals (Xie et al., 2023)). In Huang et al. (2025b), the authors propose to generate a planning model from a natural language description without human intervention. They tackle ambiguities inherent to natural language by generating various model candidates and filtering them based on semantic coherence. They further rank the multiple generated plans based on the cumulative semantic similarity scores of their constituent model. NL2P (Gestrin et al., 2024) proposes to use explicit inference steps and Chain of Thoughts back prompting to generate the PDDL domain and problem from natural language inputs. Here, we propose to finetune an LLM to learn explicit inference steps to reason on action applicability, state transitions, and plan validity to generate a plan.

On the other hand, some approaches like Stein et al. (2025) automatically translate PDDL problems into natural language and use LLMs to plan in natural language. Eventually, the plan is translated back into PDDL actions to be executed or simulated.

## B DETAILED EXPERIMENTAL SETUP

### B.1 DOMAIN DETAILS

- **Blocksworld:** The classical planning domain with blocks that can be stacked on a table or on other blocks. This domain primarily tests reasoning with a relatively small action set.
- **Mystery Blocksworld:** A more complex variant of Blocksworld with predicates identical but semantically obfuscated names.
- **Logistics:** A transportation planning domain where packages must be moved between locations using trucks and airplanes, testing the model’s ability to reason about location connectivity and multi-step transport operations.

### B.2 HYPERPARAMETER CONFIGURATION

Tab. 3 provides the complete hyperparameter configuration used in our experiments.

**Learning Rates** ( $\delta_1, \delta_2$ ) The learning rates control how aggressively the model weights are updated during training, with Phase 1 using a single learning rate and Phase 2 employing two distinct learning rates for its two-stage optimization process. Phase 1 uses a learning rate of  $2 \times 10^{-5}$  for initial instruction tuning, set relatively higher because the model must learn entirely new planning capabilities from its pre-trained foundation, applying this rate to the standard cross-entropy loss when learning to generate plans with detailed explanations of action validity. Phase 2 employs two separate learning rates within its chain-of-thought instruction tuning:  $\delta_1 = 1 \times 10^{-5}$  for Stage 1 reasoning chain optimization (Equation 2) and  $\delta_2 = 5 \times 10^{-6}$  for Stage 2 final performance optimization (Equation 3). The first learning rate  $\delta_1$  focuses on improving the quality of step-by-step logical reasoning chains, while the second learning rate  $\delta_2$  is set lower to carefully optimize overall

| Parameter                  | Phase 1    | Phase 2 (CoT)                    |
|----------------------------|------------|----------------------------------|
| Learning Rate              | 2e-5       | $\delta_1: 1e-5, \delta_2: 5e-6$ |
| Batch Size                 | 16         | 8                                |
| Max Sequence Length        | 2048       | 4096                             |
| Training Epochs            | 5          | 3                                |
| Warmup Steps               | 500        | 200                              |
| Weight Decay               | 0.01       | 0.001                            |
| Gradient Clipping          | 1.0        | 0.5                              |
| Temperature (Generation)   | 0.7        | 0.3                              |
| Max Generation Length      | 1024       | 2048                             |
| Optimizer                  | AdamW      | AdamW                            |
| $\beta_1, \beta_2$         | 0.9, 0.999 | 0.9, 0.999                       |
| $\epsilon$                 | 1e-8       | 1e-8                             |
| Iteration Limit ( $\eta$ ) | N/A        | 10, 15                           |

Table 3: Complete hyperparameter configuration for PDDL-INSTRUCT

planning performance without disrupting the reasoning capabilities developed in Stage 1. Both Phase 2 learning rates are deliberately lower than Phase 1 to enable fine-tuning of the chain-of-thought reasoning without disrupting the foundational planning knowledge already acquired.

**Batch Size** The batch size determines how many training examples are processed simultaneously before updating model weights, with values carefully chosen to balance computational efficiency with memory constraints and training dynamics. Phase 1 uses a batch size of 16, which provides sufficient gradient signal for learning basic planning concepts while remaining within GPU memory limits for the 2048-token sequences typical of initial instruction examples. Phase 2 reduces the batch size to 8 to accommodate the significantly longer chain-of-thought sequences and the additional memory overhead introduced by VAL feedback processing. The smaller batch size in Phase 2 also enables more frequent weight updates during the iterative refinement process, which is crucial for the feedback-driven learning mechanism where the model must quickly adapt to validation signals from the external verifier.

**Maximum Sequence Length** The maximum sequence length defines the upper limit of tokens the model can process in both input and output, with values scaled to accommodate the increasing complexity of reasoning required across training phases. Phase 1 sets this limit to 2048 tokens, which sufficiently captures domain definitions, problem statements, generated plans, and basic explanations of action validity without excessive computational overhead. Phase 2 doubles this limit to 4096 tokens to accommodate the detailed chain-of-thought reasoning sequences that include comprehensive state analysis, action selection justification, explicit precondition checking, effect application reasoning, state transition tracking, and goal progress evaluation. This increased capacity is essential for the model to generate the verbose logical reasoning chains that characterize effective planning verification.

**Training Epochs** The number of training epochs represents complete passes through the respective training datasets, with values chosen to ensure adequate learning while preventing overfitting to domain-specific patterns. Phase 1 employs 5 epochs to establish foundational planning knowledge, requiring more iterations because the model must learn to understand PDDL syntax, action semantics, state representations, and goal achievement from its general language understanding baseline. Phase 2 uses only 3 epochs because the model already possesses basic planning capabilities and needs only to refine its chain-of-thought reasoning processes. The reduced epoch count in Phase 2 also prevents overfitting to the specific feedback patterns generated by VAL, ensuring that the learned reasoning generalizes beyond the particular validation scenarios encountered during training.

**Warmup Steps** Warmup steps implement a gradual increase in learning rate from zero to the target value at the beginning of training, preventing training instability that can arise from large initial weight updates on a partially trained model. Phase 1 uses 500 warmup steps to ensure stable convergence when adapting the pre-trained language model to the structured domain of planning,

1026 where the token distributions and semantic relationships differ significantly from general text. Phase  
1027 2 employs 200 warmup steps, fewer than Phase 1 because the model has already been adapted to  
1028 the planning domain and requires less careful initialization. The warmup mechanism is particularly  
1029 important in Phase 2 given the complex loss landscape created by the two-stage optimization process  
1030 and the feedback-driven training dynamics.

1031  
1032 **Weight Decay** Weight decay implements L2 regularization by adding a penalty term proportional  
1033 to the squared magnitude of model weights, preventing overfitting by discouraging the model from  
1034 relying too heavily on specific parameter configurations. Phase 1 uses a weight decay of 0.01,  
1035 relatively high to prevent the model from memorizing specific instruction-response patterns rather  
1036 than learning generalizable planning principles. Phase 2 reduces weight decay to 0.001 to allow  
1037 more fine-grained parameter adjustments necessary for learning subtle logical reasoning patterns  
1038 while still providing some regularization against overfitting to the VAL feedback patterns. The lower  
1039 weight decay in Phase 2 recognizes that the chain-of-thought reasoning requires precise parameter  
1040 configurations that might be overly penalized by stronger regularization.

1041  
1042 **Gradient Clipping** Gradient clipping prevents exploding gradients by setting a maximum allowed  
1043 norm for gradient vectors, ensuring training stability particularly in the complex optimization land-  
1044 scape of instruction tuning. Phase 1 employs gradient clipping at 1.0, providing stability during  
1045 the initial adaptation from general language modeling to planning-specific tasks where gradient  
1046 magnitudes can vary significantly across different types of planning problems. Phase 2 uses more  
1047 conservative clipping at 0.5 because the model is more stable after Phase 1 training, and the chain-  
1048 of-thought training process requires more careful weight updates to maintain the delicate balance  
1049 between logical reasoning accuracy and plan generation quality. The tighter clipping in Phase 2 also  
1050 helps manage gradient spikes that can occur when VAL feedback indicates dramatic plan validity  
1051 changes.

1052 **Temperature (Generation)** The temperature parameter controls the randomness in text generation  
1053 during training validation and inference, with lower values producing more deterministic outputs and  
1054 higher values encouraging exploration of diverse response patterns. Phase 1 uses a temperature of  
1055 0.7, allowing moderate exploration of different planning approaches and explanation styles while  
1056 maintaining coherent output quality. This higher temperature helps the model discover various ways  
1057 to explain action validity and plan construction during the foundational learning phase. Phase 2  
1058 reduces temperature to 0.3 to focus generation on precise, logical reasoning steps where consistency  
1059 and accuracy are more important than diversity. The lower temperature ensures that chain-of-thought  
1060 reasoning follows logical patterns rather than exploring creative but potentially incorrect reasoning  
1061 paths.

1062  
1063 **Maximum Generation Length** The maximum generation length sets the upper bound on tokens  
1064 the model can produce in response to prompts, scaled to accommodate the verbosity requirements of  
1065 each training phase. Phase 1 limits generation to 1024 tokens, sufficient for producing plans with  
1066 basic explanations of action applicability and goal achievement without excessive computational  
1067 cost. Phase 2 increases this limit to 2048 tokens to accommodate detailed step-by-step reasoning  
1068 chains that include comprehensive state analysis, action justification, precondition verification, effect  
1069 application reasoning, and goal progress tracking. This increased generation capacity is essential for  
1070 the model to produce the verbose logical reasoning that characterizes effective planning verification  
1071 and enables meaningful feedback from the VAL validator.

1072 **Optimizer (AdamW)** AdamW serves as the optimization algorithm for both training phases,  
1073 chosen for its superior performance in transformer fine-tuning scenarios compared to standard  
1074 optimizers. AdamW combines the adaptive learning rate benefits of Adam with improved weight  
1075 decay handling, making it particularly effective for instruction tuning where the model must adapt  
1076 pre-trained knowledge to new task-specific patterns. The optimizer handles sparse gradients well,  
1077 which is crucial in planning scenarios where many potential actions are invalid in any given state,  
1078 leading to sparse activation patterns. AdamW’s momentum-based updates help navigate the complex  
1079 loss landscape created by the combination of language modeling objectives and planning-specific  
constraints.

**Beta Parameters** ( $\beta_1, \beta_2$ ) The beta parameters control the exponential decay rates for AdamW’s moment estimates, with  $\beta_1 = 0.9$  governing the first moment (gradient moving average) and  $\beta_2 = 0.999$  governing the second moment (squared gradient moving average). These standard values have proven effective across a wide range of transformer training scenarios and provide appropriate momentum characteristics for instruction tuning. The  $\beta_1$  value of 0.9 provides sufficient momentum to smooth gradient noise while remaining responsive to genuine changes in gradient direction, particularly important when learning from VAL feedback in Phase 2. The  $\beta_2$  value of 0.999 provides stable variance estimates essential for adaptive learning rate scaling across the diverse parameter space of large language models.

**Epsilon** ( $\epsilon$ ) The epsilon parameter adds a small constant of  $1 \times 10^{-8}$  to the denominator in AdamW’s update rule to prevent numerical instability from division by zero or near-zero values. This value represents a standard choice that provides numerical stability without meaningfully affecting the optimization dynamics. The parameter becomes particularly important during Phase 2 training where the complex loss landscape and feedback-driven updates can occasionally produce very small gradient variances that might otherwise cause numerical issues. The chosen value ensures robust training across the full range of planning problems and feedback scenarios encountered during instruction tuning.

**Iteration Limit** ( $\eta$ ) The iteration limit is unique to Phase 2 and controls how many feedback loops the model experiences with the VAL validator during chain-of-thought instruction tuning. Values of 10 and 15 represent the number of times the model can generate a plan with reasoning, receive detailed feedback about logical errors, learn from this feedback, and attempt improved solutions. This parameter directly controls the trade-off between training thoroughness and computational cost, as each iteration requires plan generation, validation, and model updating. Higher values of  $\eta$  allow more refinement of reasoning capabilities but significantly increase training time and computational requirements. The specific values were chosen to provide sufficient learning opportunities while maintaining practical training times.

### B.3 MATHEMATICAL FORMULATION OF LOSS FUNCTIONS

We formally define the two specialized loss functions that drive our two-stage optimization process in Phase 2. These functions are carefully designed to target both the logical reasoning capabilities and final planning performance of the model.

#### B.3.1 REASONING CHAIN LOSS FUNCTION

The reasoning chain loss function  $\mathcal{L}_{\text{reasoning}}$  measures the quality of the model’s step-by-step logical reasoning over state-action-state transitions:

$$\mathcal{L}_{\text{reasoning}}(\theta_t, \mathbb{D}_{\text{reasoning}}^t) = \frac{1}{|\mathbb{D}_{\text{reasoning}}^t|} \sum_{(s_{i-1}, a_i, s_i, f_i) \in \mathbb{D}_{\text{reasoning}}^t} \mathcal{L}_{\text{step}}(s_{i-1}, a_i, s_i, f_i) \quad (4)$$

where each training example consists of a state transition  $(s_{i-1}, a_i, s_i)$  and VAL feedback  $f_i$ . The step-wise loss  $\mathcal{L}_{\text{step}}$  is defined as:

$$\mathcal{L}_{\text{step}}(s_{i-1}, a_i, s_i, f_i) = d_{\text{state}}(s_i, s_i^{\text{expected}}) + \lambda_{\text{feedback}} \cdot \mathcal{L}_{\text{feedback}}(f_i) \quad (5)$$

where  $s_i^{\text{expected}}$  is the deterministically computed next state given action  $a_i$  applied to  $s_{i-1}$ , and  $d_{\text{state}}$  is the state distance function defined as:

$$d_{\text{state}}(s, s') = |s \Delta s'| = |s \setminus s'| + |s' \setminus s| \quad (6)$$

This measures the symmetric difference between the two sets of predicates, counting predicates that are in one state but not the other.

The feedback loss  $\mathcal{L}_{\text{feedback}}$  incorporates VAL verification results to guide logical reasoning:

$$\mathcal{L}_{\text{feedback}}(f_i) = \begin{cases} 0 & \text{if action } a_i \text{ is valid} \\ \alpha_{\text{precond}} & \text{if precondition violation detected} \\ \alpha_{\text{effect}} & \text{if incorrect effect application} \\ \alpha_{\text{goal}} & \text{if goal achievement failure} \end{cases} \quad (7)$$

where  $\alpha_{\text{precond}} = 1.0$ ,  $\alpha_{\text{effect}} = 1.0$ ,  $\alpha_{\text{goal}} = 1.5$  are penalty weights for different error types, and  $\lambda_{\text{feedback}} = 0.1$  balances the feedback signal with the primary reasoning objective.

### B.3.2 FINAL PERFORMANCE LOSS FUNCTION

The final performance loss function  $\mathcal{L}_{\text{final}}$  measures how well the complete plans generated through chain-of-thought reasoning achieve the planning objectives:

$$\mathcal{L}_{\text{final}}(\theta_t^r, \mathbb{D}_{\text{final}}^t) = \frac{1}{|\mathbb{D}_{\text{final}}^t|} \sum_{(d,p,\pi,v) \in \mathbb{D}_{\text{final}}^t} \mathcal{L}_{\text{plan}}(d, p, \pi, v) \quad (8)$$

where each training example consists of a domain  $d$ , problem  $p$ , generated plan  $\pi$ , and binary validity label  $v$  from VAL. The plan-level loss is:

$$\mathcal{L}_{\text{plan}}(d, p, \pi, v) = \mathbb{I}[v = 0] \cdot \beta + \alpha \cdot \text{BCE}(v, \hat{v}) \quad (9)$$

where  $\mathbb{I}[v = 0]$  is an indicator function that equals 1 when the plan is invalid (providing a fixed penalty  $\beta = 2.0$  for invalid plans) and 0 when valid; and  $\text{BCE}(v, \hat{v})$  is the binary cross-entropy loss between the VAL validity label  $v$  and the model’s predicted validity  $\hat{v}$ , with  $\alpha = 0.5$  balancing plan generation accuracy with validity prediction.

### B.3.3 DATASET CONSTRUCTION FOR LOSS COMPUTATION

The reasoning dataset  $\mathbb{D}_{\text{reasoning}}^t$  contains individual state-action-state triplets extracted from chain-of-thought sequences:

$$\mathbb{D}_{\text{reasoning}}^t = \{(s_{i-1}, a_i, s_i, f_i) : \forall \text{ steps in CoT plans generated at iteration } t\} \quad (10)$$

The final dataset  $\mathbb{D}_{\text{final}}^t$  contains complete planning instances with validity judgments:

$$\mathbb{D}_{\text{final}}^t = \{(d_j, p_j, \pi_j^t, v_j^t) : \forall \text{ problems } j \text{ at iteration } t\} \quad (11)$$

where  $\pi_j^t$  is the complete plan generated for problem  $j$  at iteration  $t$ , and  $v_j^t$  is the corresponding VAL validity assessment.

## B.4 ALGORITHM

## Algorithm 1: PDDL-INSTRUCT: Chain-of-Thought Instruction Tuning for Symbolic Planning

---

**Input:** Pre-trained LLM  $M_{\theta_0}$ , Phase 1 dataset  $\mathbb{D}_1$ , Phase 2 dataset  $\mathbb{D}_2$ , VAL validator, iteration limit  $\eta$ , learning rates  $\delta_1, \delta_2$

**Output:** Instruction-tuned model  $M_{\theta^*}$

- 1: **Phase 1: Initial Instruction Tuning**
- 2: **for** epoch  $e = 1$  to  $E_1$  **do**
- 3:     **for** batch  $(d_i, p_i, \pi_i, f_i) \in \mathbb{D}_1$  **do**
- 4:          $y_i \leftarrow M_{\theta}(d_i, p_i)$  ▷ Generate plan with explanation
- 5:          $\mathcal{L}_1 \leftarrow -\log P(\pi_i, f_i | d_i, p_i, \theta)$
- 6:          $\theta \leftarrow \theta - \delta_1 \nabla_{\theta} \mathcal{L}_1$
- 7:     **end for**
- 8: **end for**
- 9:  $\theta_1 \leftarrow \theta$  ▷ Save Phase 1 model
- 10: **Phase 2: CoT Instruction Tuning**
- 11: **for** iteration  $t = 1$  to  $\eta$  **do**
- 12:     Initialize datasets  $\mathbb{D}_{reasoning}^t \leftarrow \emptyset, \mathbb{D}_{final}^t \leftarrow \emptyset$
- 13:     **for** problem  $(d_j, p_j) \in \mathbb{D}_2$  **do**
- 14:         Generate CoT plan:  $\pi_t^j = \{(s_0, a_1, s_1), (s_1, a_2, s_2), \dots, (s_{n-1}, a_n, s_n)\}$
- 15:         using  $M_{\theta_t}(d_j, p_j)$
- 16:         Validate plan with VAL:  $f_j \leftarrow \text{VAL}(\pi_t^j, d_j, p_j)$
- 17:         **if**  $f_j$  indicates valid plan **then**
- 18:              $\mathbb{D}_{final}^t \leftarrow \mathbb{D}_{final}^t \cup \{(d_j, p_j, \pi_t^j, 1)\}$
- 19:         **else**
- 20:             Extract detailed feedback for each invalid step
- 21:              $\mathbb{D}_{final}^t \leftarrow \mathbb{D}_{final}^t \cup \{(d_j, p_j, \pi_t^j, 0)\}$
- 22:         **end if**
- 23:         **for** each step  $(s_{i-1}, a_i, s_i) \in \pi_t^j$  **do**
- 24:             Get step-level VAL feedback:  $f_i \leftarrow \text{VAL-step}(s_{i-1}, a_i, s_i, d_j)$
- 25:              $\mathbb{D}_{reasoning}^t \leftarrow \mathbb{D}_{reasoning}^t \cup \{(s_{i-1}, a_i, s_i, f_i)\}$
- 26:         **end for**
- 27:     **end for**
- 28:     **Stage 1: Reasoning Chain Optimization**
- 29:     **for** epoch  $e = 1$  to  $E_{2a}$  **do**
- 30:         **for** batch  $B \in \mathbb{D}_{reasoning}^t$  **do**
- 31:              $L_{reasoning} \leftarrow \frac{1}{|B|} \sum_{(s_{i-1}, a_i, s_i, f_i) \in B} L_{step}(s_{i-1}, a_i, s_i, f_i)$
- 32:              $\theta_t^r \leftarrow \theta_t - \delta_1 \nabla_{\theta_t} L_{reasoning}$
- 33:         **end for**
- 34:     **end for**
- 35:     **Stage 2: Final Performance Optimization**
- 36:     **for** epoch  $e = 1$  to  $E_{2b}$  **do**
- 37:         **for** batch  $B \in \mathbb{D}_{final}^t$  **do**
- 38:              $\mathcal{L}_{final} \leftarrow \frac{1}{|B|} \sum_{(d,p,\pi,v) \in B} \mathcal{L}_{plan}(d, p, \pi, v)$
- 39:              $\theta_{t+1} \leftarrow \theta_t^r - \delta_2 \nabla_{\theta_t^r} \mathcal{L}_{final}$
- 40:         **end for**
- 41:     **end for**
- 42: **end for**
- 43: **return**  $M_{\theta^*}$  where  $\theta^* = \theta_{\eta}$

---

## C SAMPLE PROMPTS FOR BLOCKSWORLD DOMAIN

This section presents the specific prompt templates used in our PDDL-INSTRUCT framework for the Blocksworld domain. We provide examples for both Phase 1 (Initial Instruction Tuning) and Phase 2

1242 (CoT Instruction Tuning) to demonstrate how our approach teaches models to reason about action  
 1243 applicability and state transitions.

1244

## 1246 C.1 PHASE 1: INITIAL INSTRUCTION TUNING PROMPTS

1247

### 1248 C.1.1 CORRECT PLAN EXAMPLE

1249

1250

#### Phase 1 Prompt - Correct Plan

1251

1252 [INSTRUCTION] Given the following PDDL domain and problem, analyze  
 1253 the provided plan and explain why each action is valid.

1254

1255

1256

1257

1258

1259

1260

1261

1262

1263

1264

1265

1266

1267

1268

1269

1270

1271

1272

1273

1274

1275

1276

1277

1278

1279

1280

1281

1282

1283

1284

1285

1286

1287

1288

1289

1290

1291

1292

1293

1294

1295

```
[DOMAIN]
(define (domain blocksworld)
  (:requirements :strips)
  (:predicates
    (on ?x ?y) (ontable ?x) (clear ?x) (handempty) (holding ?x))
  (:action pick-up
    :parameters (?x)
    :precondition (and (clear ?x) (ontable ?x) (handempty))
    :effect (and (not (ontable ?x)) (not (handempty))
                 (not (clear ?x)) (holding ?x)))
  (:action put-down
    :parameters (?x)
    :precondition (holding ?x)
    :effect (and (not (holding ?x)) (handempty)
                 (ontable ?x) (clear ?x)))
  (:action stack
    :parameters (?x ?y)
    :precondition (and (holding ?x) (clear ?y))
    :effect (and (not (holding ?x)) (not (clear ?y))
                 (handempty) (on ?x ?y) (clear ?x)))
  (:action unstack
    :parameters (?x ?y)
    :precondition (and (on ?x ?y) (clear ?x) (handempty))
    :effect (and (not (on ?x ?y)) (not (handempty))
                 (holding ?x) (clear ?y))))

[PROBLEM]
(define (problem bw-simple)
  (:domain blocksworld)
  (:objects a b c)
  (:init (ontable a) (ontable b) (ontable c)
         (clear a) (clear b) (clear c) (handempty))
  (:goal (and (on a b) (on b c))))

[PLAN]
1. (pick-up b)
2. (stack b c)
3. (pick-up a)
4. (stack a b)

[EXPECTED RESPONSE] This plan is VALID. Let me analyze each action:

[Action 1: (pick-up b)]
- Preconditions: (clear b), (ontable b), (handempty)
- Initial state satisfies all preconditions: b is clear, b is on table, and hand is empty
- Effects: b is now held, hand is not empty, b is not on table, b is not clear
```

```

1296
1297 - Resulting state: (ontable a) (ontable c) (clear a) (clear c)
1298 (holding b)
1299
1300 [Action 2: (stack b c)]
1301 - Preconditions: (holding b), (clear c)
1302 - Current state satisfies preconditions: holding b and c is clear
1303 - Effects: b is stacked on c, hand becomes empty, c is no longer
1304 clear, b becomes clear
1305 - Resulting state: (ontable c) (ontable a) (clear a) (clear b) (on
1306 b c) (handempty)
1307
1308 [Action 3: (pick-up a)]
1309 - Preconditions: (clear a), (ontable a), (handempty)
1310 - Initial state satisfies all preconditions: a is clear, a is on
1311 table, and hand is empty
1312 - Effects: a is now held, hand is not empty, a is not on table, a
1313 is not clear
1314 - Resulting state: (on b c) (ontable c) (clear b) (holding a)
1315
1316 [Action 4: (stack a b)]
1317 - Preconditions: (holding a), (clear b)
1318 - Current state satisfies preconditions: holding a and b is clear
1319 - Effects: a is stacked on b, hand becomes empty, b is no longer
1320 clear, a becomes clear
1321 - Resulting state: (ontable c) (on b c) (on a b) (clear a)
1322 (handempty)
1323
1324 The plan succeeds because a is stacked on b, and b is stacked on c.

```

### C.1.2 INCORRECT PLAN EXAMPLE

```

1324 Phase 1 Prompt - Incorrect Plan
1325
1326 [INSTRUCTION] Given the following PDDL domain and problem, analyze
1327 the provided plan and explain why each action is valid.
1328
1329 [DOMAIN]
1330 (define (domain blocksworld)
1331 (:requirements :strips)
1332 (:predicates
1333 (on ?x ?y) (ontable ?x) (clear ?x) (handempty) (holding ?x))
1334 (:action pick-up
1335 :parameters (?x)
1336 :precondition (and (clear ?x) (ontable ?x) (handempty))
1337 :effect (and (not (ontable ?x)) (not (handempty))
1338 (not (clear ?x)) (holding ?x)))
1339 (:action put-down
1340 :parameters (?x)
1341 :precondition (holding ?x)
1342 :effect (and (not (holding ?x)) (handempty)
1343 (ontable ?x) (clear ?x)))
1344 (:action stack
1345 :parameters (?x ?y)
1346 :precondition (and (holding ?x) (clear ?y))
1347 :effect (and (not (holding ?x)) (not (clear ?y))
1348 (handempty) (on ?x ?y) (clear ?x)))
1349 (:action unstack
1350 :parameters (?x ?y)
1351 :precondition (and (on ?x ?y) (clear ?x) (handempty))
1352 :effect (and (not (on ?x ?y)) (not (handempty))
1353 (holding ?x) (clear ?y))))

```

```

1350
1351
1352 [PROBLEM]
1353 (define (problem bw-simple)
1354   (:domain blocksworld)
1355   (:objects a b c)
1356   (:init (ontable a) (ontable b) (ontable c)
1357         (clear a) (clear b) (clear c) (handempty))
1358   (:goal (and (on a b) (on b c))))
1359
1360 [PLAN]
1361 1. (stack a b)
1362 2. (stack b c)
1363
1364 [EXPECTED RESPONSE] This plan is INVALID. Let me analyze each
1365 action:
1366
1367 [Action 1: (stack a b)]
1368 - Preconditions: (holding a), (clear b)
1369 - Current state: (ontable a) (ontable b) (ontable c) (clear a)
1370 (clear b) (clear c) (handempty)
1371 - VIOLATION: The precondition (holding a) is not satisfied - the
1372 hand is empty and a is on the table
1373 - To stack a on b, we must first pick up a
1374
1375 [Action 2: (stack b c)]
1376 - Since Action 1 failed, this action cannot be evaluated in a
1377 valid state sequence
1378 - Even if Action 1 succeeded, we would need to be holding b to
1379 stack it on c
1380
1381 The plan fails because it attempts to stack blocks without first
1382 picking them up. The correct sequence would be: (pick-up a),
1383 (stack a b), (pick-up b), (stack b c).
1384

```

## 1380 C.2 PHASE 2: CHAIN-OF-THOUGHT INSTRUCTION TUNING PROMPTS

### 1381 C.2.1 COT GENERATION PROMPT

#### 1382 Phase 2 CoT Generation Prompt

```

1383 [INSTRUCTION] Generate a plan for the given problem using
1384 step-by-step reasoning. For each action, explicitly verify
1385 preconditions, apply effects, and track state changes.
1386
1387 [DOMAIN]
1388 (define (domain blocksworld)
1389   (:requirements :strips)
1390   (:predicates
1391     (on ?x ?y) (ontable ?x) (clear ?x) (handempty) (holding ?x))
1392   (:action pick-up
1393     :parameters (?x)
1394     :precondition (and (clear ?x) (ontable ?x) (handempty))
1395     :effect (and (not (ontable ?x)) (not (handempty))
1396                (not (clear ?x)) (holding ?x)))
1397   (:action put-down
1398     :parameters (?x)
1399     :precondition (holding ?x)
1400     :effect (and (not (holding ?x)) (handempty)
1401                (ontable ?x) (clear ?x)))
1402   (:action stack
1403     :parameters (?x ?y)

```

```

1404
1405 :precondition (and (holding ?x) (clear ?y))
1406 :effect (and (not (holding ?x)) (not (clear ?y))
1407           (handempty) (on ?x ?y) (clear ?x)))
1408 (:action unstack
1409   :parameters (?x ?y)
1410   :precondition (and (on ?x ?y) (clear ?x) (handempty))
1411   :effect (and (not (on ?x ?y)) (not (handempty))
1412             (holding ?x) (clear ?y))))
1412
1413 [PROBLEM]
1414 (define (problem bw-tower)
1415   (:domain blocksworld)
1416   (:objects a b c)
1417   (:init (on c b) (ontable b) (ontable a)
1418         (clear c) (clear a) (handempty))
1419   (:goal (and (on a c) (on c b))))
1420
1421 [EXPECTED RESPONSE]
1422
1423 Initial State Analysis:
1424 Current state: (on c b), (ontable b), (ontable a), (clear c),
1425               (clear a), (handempty)
1426 Goal: (on a c), (on c b)
1427
1428 [STEP BY STEP PLANNING]
1429
1430 [Step 1: State s0 Action a1 State s1]
1431 - Current state s0: (on c b), (ontable b), (ontable a), (clear c),
1432                   (clear a), (handempty)
1433 - Proposed action a1: (pick-up a)
1434 - Precondition check:
1435   - (clear a): TRUE in s0
1436   - (ontable a): TRUE in s0
1437   - (handempty): TRUE in s0
1438 - Action is APPLICABLE
1439 - Effect application:
1440   - Add: (holding a)
1441   - Delete: (ontable a), (handempty), (clear a)
1442 - Resulting state s1: (on c b), (ontable b), (clear c), (holding a)
1443
1444 [Step 2: State s1 Action a2 State s2]
1445 - Current state s1: (on c b), (ontable b), (clear c), (holding a)
1446 - Proposed action a2: (stack a c)
1447 - Precondition check:
1448   - (holding a): TRUE in s1
1449   - (clear c): TRUE in s1
1450 - Action is APPLICABLE
1451 - Effect application:
1452   - Add: (on a c), (handempty), (clear a)
1453   - Delete: (holding a), (clear c)
1454 - Resulting state s2: (on c b), (ontable b), (on a c),
1455                   (handempty), (clear a)
1456
1457 [GOAL ACHIEVEMENT CHECK]
1458 Required: (on a c), (on c b)
1459 Current state s2: (on c b), (ontable b), (on a c), (handempty),
1460                 (clear a)
1461 - (on a c): TRUE in s2
1462 - (on c b): TRUE in s2
1463 Goal is ACHIEVED.
1464
1465 [FINAL PLAN] (pick-up a), (stack a c)

```

## 1458 C.2.2 CoT WITH FEEDBACK INTEGRATION: INCORRECT PLAN

1459

1460 **B.2.2.1 Binary Feedback**

1461

## 1462 Phase 2 CoT Binary Feedback - Incorrect Plan

1463

1464 [INSTRUCTION] You previously generated a plan with step-by-step  
 1465 reasoning. The validator has provided feedback on your  
 1466 reasoning. Use this feedback to generate a corrected plan with  
 1467 improved logical reasoning.

1468

```
1469 [DOMAIN]
1470 (define (domain blocksworld)
1471   (:requirements :strips)
1472   (:predicates
1473    (on ?x ?y) (ontable ?x) (clear ?x) (handempty) (holding ?x))
1474   (:action pick-up
1475    :parameters (?x)
1476    :precondition (and (clear ?x) (ontable ?x) (handempty))
1477    :effect (and (not (ontable ?x)) (not (handempty))
1478               (not (clear ?x)) (holding ?x)))
1479   (:action put-down
1480    :parameters (?x)
1481    :precondition (holding ?x)
1482    :effect (and (not (holding ?x)) (handempty)
1483               (ontable ?x) (clear ?x)))
1484   (:action stack
1485    :parameters (?x ?y)
1486    :precondition (and (holding ?x) (clear ?y))
1487    :effect (and (not (holding ?x)) (not (clear ?y))
1488               (handempty) (on ?x ?y) (clear ?x)))
1489   (:action unstack
1490    :parameters (?x ?y)
1491    :precondition (and (on ?x ?y) (clear ?x) (handempty))
1492    :effect (and (not (on ?x ?y)) (not (handempty))
1493               (holding ?x) (clear ?y))))
```

1490

```
1491 [PROBLEM]
1492 (define (problem bw-simple)
1493   (:domain blocksworld)
1494   (:objects a b c)
1495   (:init (ontable a) (ontable b) (ontable c)
1496          (clear a) (clear b) (clear c) (handempty))
1497   (:goal (and (on a b) (on b c))))
```

1496

```
1497 [PREVIOUS PLAN]
1498 Step 1: (pick-up b) - VALID
1499 Step 2: (stack b c) - VALID
1500 Step 3: (stack a b) - INVALID
```

1501

```
1502 [VAL FEEDBACK]
1503 Plan Validation details
1504 -----
```

```
1505 Checking next happening (time 1)
1506 Deleting (ontable b)
1507 Deleting (handempty)
1508 Deleting (clear b)
1509 Adding (holding b)
```

```
1510 Checking next happening (time 2)
1511 Deleting (holding b)
1512 Deleting (clear c)
1513 Adding (handempty)
```

```

1512
1513 Adding (on b c)
1514 Adding (clear b)
1515
1516 Checking next happening (time 3)
1517 Plan failed because of unsatisfied precondition in:
1518 (stack a b)
1519
1520 Plan failed to execute
1521
1522 [GENERATE CORRECTED PLAN WITH REASONING]

```

### B.2.2.2 Detailed Feedback

#### Phase 2 CoT Detailed Feedback - Incorrect Plan

```

1526 [INSTRUCTION] You previously generated a plan with step-by-step
1527 reasoning. The validator has provided feedback on your
1528 reasoning. Use this feedback to generate a corrected plan with
1529 improved logical reasoning.
1530
1531 [DOMAIN]
1532 (define (domain blocksworld)
1533   (:requirements :strips)
1534   (:predicates
1535     (on ?x ?y) (ontable ?x) (clear ?x) (handempty) (holding ?x))
1536   (:action pick-up
1537     :parameters (?x)
1538     :precondition (and (clear ?x) (ontable ?x) (handempty))
1539     :effect (and (not (ontable ?x)) (not (handempty))
1540                 (not (clear ?x)) (holding ?x)))
1541   (:action put-down
1542     :parameters (?x)
1543     :precondition (holding ?x)
1544     :effect (and (not (holding ?x)) (handempty)
1545                 (ontable ?x) (clear ?x)))
1546   (:action stack
1547     :parameters (?x ?y)
1548     :precondition (and (holding ?x) (clear ?y))
1549     :effect (and (not (holding ?x)) (not (clear ?y))
1550                 (handempty) (on ?x ?y) (clear ?x)))
1551   (:action unstack
1552     :parameters (?x ?y)
1553     :precondition (and (on ?x ?y) (clear ?x) (handempty))
1554     :effect (and (not (on ?x ?y)) (not (handempty))
1555                 (holding ?x) (clear ?y))))
1556
1557 [PROBLEM]
1558 (define (problem bw-simple)
1559   (:domain blocksworld)
1560   (:objects a b c)
1561   (:init (ontable a) (ontable b) (ontable c)
1562         (clear a) (clear b) (clear c) (handempty))
1563   (:goal (and (on a b) (on b c))))
1564
1565 [PREVIOUS PLAN]
1566 Step 1: (pick-up b) - VALID
1567 Step 2: (stack b c) - VALID
1568 Step 3: (stack a b) - INVALID
1569
1570 [VAL FEEDBACK]
1571 Plan Validation details
1572 -----

```

```

1566
1567 Checking next happening (time 1)
1568 Deleting (ontable b)
1569 Deleting (handempty)
1570 Deleting (clear b)
1571 Adding (holding b)
1572
1573 Checking next happening (time 2)
1574 Deleting (holding b)
1575 Deleting (clear c)
1576 Adding (handempty)
1577 Adding (on b c)
1578 Adding (clear b)
1579
1580 Checking next happening (time 3)
1581 Plan failed because of unsatisfied precondition in:
1582 (stack a b)
1583
1584 Plan failed to execute
1585
1586 Plan Repair Advice:
1587
1588 (stack a b) has an unsatisfied precondition at time 3
1589 (Set (holding a) to true)
1590
1591 [EXPLANATION] This plan is INVALID. Here is the analysis of each
1592 action:
1593
1594 [Action 1: (pick-up b)]
1595 - Preconditions: (clear b), (ontable b), (handempty)
1596 - Initial state satisfies all preconditions: b is clear, b is on
1597 table, and hand is empty
1598 - Effects: b is now held, hand is not empty, b is not on table, b
1599 is not clear
1600 - Resulting state: (ontable a) (ontable c) (clear a) (clear c)
1601 (holding b)
1602
1603 [Action 2: (stack b c)]
1604 - Preconditions: (holding b), (clear c)
1605 - Current state satisfies preconditions: holding b and c is clear
1606 - Effects: b is stacked on c, hand becomes empty, c is no longer
1607 clear, b becomes clear
1608 - Resulting state: (ontable c) (ontable a) (clear a) (clear b) (on
1609 b c) (handempty)
1610
1611 [Action 3: (stack a b)]
1612 - Preconditions: (holding a), (clear b)
1613 - Current state: (ontable c) (ontable a) (clear a) (clear b) (on b
1614 c) (handempty)
1615 - VIOLATION: The precondition (holding a) is not satisfied - the
1616 hand is empty and a is on the table
1617
1618 [GENERATE CORRECTED PLAN WITH REASONING]
1619

```

### C.2.3 CoT WITH FEEDBACK INTEGRATION: CORRECT PLAN

#### B.2.3.1 Binary Feedback

##### Phase 2 CoT Binary Feedback - Correct Plan

```

1618 [INSTRUCTION] You previously generated a plan with step-by-step
1619 reasoning. The validator has provided feedback on your

```

```

1620 reasoning. Use this feedback to generate a corrected plan with
1621 improved logical reasoning.
1622
1623 [DOMAIN]
1624 (define (domain blocksworld)
1625   (:requirements :strips)
1626   (:predicates
1627     (on ?x ?y) (ontable ?x) (clear ?x) (handempty) (holding ?x))
1628   (:action pick-up
1629     :parameters (?x)
1630     :precondition (and (clear ?x) (ontable ?x) (handempty))
1631     :effect (and (not (ontable ?x)) (not (handempty))
1632                (not (clear ?x)) (holding ?x)))
1632   (:action put-down
1633     :parameters (?x)
1634     :precondition (holding ?x)
1635     :effect (and (not (holding ?x)) (handempty)
1636                (ontable ?x) (clear ?x)))
1636   (:action stack
1637     :parameters (?x ?y)
1638     :precondition (and (holding ?x) (clear ?y))
1639     :effect (and (not (holding ?x)) (not (clear ?y))
1640                (handempty) (on ?x ?y) (clear ?x)))
1641   (:action unstack
1642     :parameters (?x ?y)
1643     :precondition (and (on ?x ?y) (clear ?x) (handempty))
1644     :effect (and (not (on ?x ?y)) (not (handempty))
1645                (holding ?x) (clear ?y))))
1645
1646 [PROBLEM]
1647 (define (problem bw-simple)
1648   (:domain blocksworld)
1649   (:objects a b c)
1650   (:init (ontable a) (ontable b) (ontable c)
1651          (clear a) (clear b) (clear c) (handempty))
1652   (:goal (and (on a b) (on b c))))
1653
1654 [PREVIOUS PLAN]
1655 Step 1: (pick-up b) - VALID
1656 Step 2: (stack b c) - VALID
1657 Step 3: (pick-up a) - VALID
1658 Step 4: (stack a b) - VALID
1659
1660 [VAL FEEDBACK]
1661 Plan Validation details
1662 -----
1663 Checking next happening (time 1)
1664 Deleting (ontable b)
1665 Deleting (handempty)
1666 Deleting (clear b)
1667 Adding (holding b)
1668
1669 Checking next happening (time 2)
1670 Deleting (holding b)
1671 Deleting (clear c)
1672 Adding (handempty)
1673 Adding (on b c)
1674 Adding (clear b)
1675
1676 Checking next happening (time 3)
1677 Deleting (ontable a)
1678 Deleting (handempty)
1679 Deleting (clear a)

```

```

1674
1675 Adding (holding a)
1676
1677 Checking next happening (time 4)
1678 Deleting (holding a)
1679 Deleting (clear b)
1680 Adding (handempty)
1681 Adding (on a b)
1682 Adding (clear a)
1683 Plan executed successfully - checking goal
1684 Plan valid

```

### B.2.3.2 Detailed Feedback

#### Phase 2 CoT Detailed Feedback - Correct Plan

```

1688 [INSTRUCTION] You previously generated a plan with step-by-step
1689 reasoning. The validator has provided feedback on your
1690 reasoning. Use this feedback to generate a corrected plan with
1691 improved logical reasoning.
1692
1693 [DOMAIN]
1694 (define (domain blocksworld)
1695   (:requirements :strips)
1696   (:predicates
1697     (on ?x ?y) (ontable ?x) (clear ?x) (handempty) (holding ?x))
1698   (:action pick-up
1699     :parameters (?x)
1700     :precondition (and (clear ?x) (ontable ?x) (handempty))
1701     :effect (and (not (ontable ?x)) (not (handempty))
1702                 (not (clear ?x)) (holding ?x)))
1703   (:action put-down
1704     :parameters (?x)
1705     :precondition (holding ?x)
1706     :effect (and (not (holding ?x)) (handempty)
1707                 (ontable ?x) (clear ?x)))
1708   (:action stack
1709     :parameters (?x ?y)
1710     :precondition (and (holding ?x) (clear ?y))
1711     :effect (and (not (holding ?x)) (not (clear ?y))
1712                 (handempty) (on ?x ?y) (clear ?x)))
1713   (:action unstack
1714     :parameters (?x ?y)
1715     :precondition (and (on ?x ?y) (clear ?x) (handempty))
1716     :effect (and (not (on ?x ?y)) (not (handempty))
1717                 (holding ?x) (clear ?y))))
1718
1719 [PROBLEM]
1720 (define (problem bw-simple)
1721   (:domain blocksworld)
1722   (:objects a b c)
1723   (:init (ontable a) (ontable b) (ontable c)
1724         (clear a) (clear b) (clear c) (handempty))
1725   (:goal (and (on a b) (on b c))))
1726
1727 [PREVIOUS PLAN]
1728 Step 1: (pick-up b) - VALID
1729 Step 2: (stack b c) - VALID
1730 Step 3: (pick-up a) - VALID
1731 Step 4: (stack a b) - VALID
1732
1733 [VAL FEEDBACK]
1734 Plan Validation details

```

```

1728 -----
1729
1730 Checking next happening (time 1)
1731 Deleting (ontable b)
1732 Deleting (handempty)
1733 Deleting (clear b)
1734 Adding (holding b)
1735
1736 Checking next happening (time 2)
1737 Deleting (holding b)
1738 Deleting (clear c)
1739 Adding (handempty)
1740 Adding (on b c)
1741 Adding (clear b)
1742
1743 Checking next happening (time 3)
1744 Deleting (ontable a)
1745 Deleting (handempty)
1746 Deleting (clear a)
1747 Adding (holding a)
1748
1749 Checking next happening (time 4)
1750 Deleting (holding a)
1751 Deleting (clear b)
1752 Adding (handempty)
1753 Adding (on a b)
1754 Adding (clear a)
1755 Plan executed successfully - checking goal
1756 Plan valid
1757
1758 [EXPLANATION] This plan is VALID. Here is the analysis of each
1759 action:
1760
1761 [Action 1: (pick-up b)]
1762 - Preconditions: (clear b), (ontable b), (handempty)
1763 - Initial state satisfies all preconditions: b is clear, b is on
1764 table, and hand is empty
1765 - Effects: b is now held, hand is not empty, b is not on table, b
1766 is not clear
1767 - Resulting state: (ontable a) (ontable c) (clear a) (clear c)
1768 (holding b)
1769
1770 [Action 2: (stack b c)]
1771 - Preconditions: (holding b), (clear c)
1772 - Current state satisfies preconditions: holding b and c is clear
1773 - Effects: b is stacked on c, hand becomes empty, c is no longer
1774 clear, b becomes clear
1775 - Resulting state: (ontable c) (ontable a) (clear a) (clear b) (on
1776 b c) (handempty)
1777
1778 [Action 3: (pick-up a)]
1779 - Preconditions: (clear a), (ontable a), (handempty)
1780 - Initial state satisfies all preconditions: a is clear, a is on
1781 table, and hand is empty
1782 - Effects: a is now held, hand is not empty, a is not on table, a
1783 is not clear
1784 - Resulting state: (on b c) (ontable c) (clear b) (holding a)
1785
1786 [Action 4: (stack a b)]
1787 - Preconditions: (holding a), (clear b)
1788 - Current state satisfies preconditions: holding a and b is clear
1789 - Effects: a is stacked on b, hand becomes empty, b is no longer
1790 clear, a becomes clear
1791

```

```

- Resulting state: (ontable c) (on b c) (on a b) (clear a)
  (handempty)

The plan succeeds.

```

## D EXTENDED EXPERIMENTAL RESULTS

### D.1 ABLATION STUDY RESULTS

Table 4 presents the contribution of each component for Llama-3-8B. The baseline achieves 28% on Blocksworld, 1% on Mystery Blocksworld, and 11% on Logistics. Phase 1 alone yields substantial improvements (78%, 32%, 23%), establishing foundational planning knowledge. Phase 2 alone (72%, 17%, 45%) underperforms on simpler domains, revealing that verification-guided feedback is most effective after basic planning concepts are learned. The full PDDL-INSTRUCT pipeline (94%, 64%, 79%) achieves 16-22 point improvements over Phase 1, demonstrating that both stages are necessary: Phase 1 provides the foundation, Phase 2 refines reasoning through verification feedback.

| Configuration                                  | Blocksworld                      | Mystery BW                       | Logistics                        |
|------------------------------------------------|----------------------------------|----------------------------------|----------------------------------|
| Baseline (No Training)                         | 28.0 $\pm$ 4.2                   | 1.0 $\pm$ 1.0                    | 11.0 $\pm$ 2.8                   |
| Phase 1 Only                                   | 78.0 $\pm$ 3.1                   | 32.0 $\pm$ 4.6                   | 23.0 $\pm$ 3.9                   |
| Phase 2 Only (Detailed Feedback, $\eta = 15$ ) | 72.0 $\pm$ 6.5                   | 17.0 $\pm$ 3.2                   | 45.0 $\pm$ 4.7                   |
| Phase 1 + Binary Feedback ( $\eta = 15$ )      | 89.0 $\pm$ 2.7                   | 49.0 $\pm$ 5.2                   | 72.0 $\pm$ 4.1                   |
| Phase 1 + Detailed Feedback ( $\eta = 15$ )    | <b>94.0 <math>\pm</math> 1.5</b> | <b>64.0 <math>\pm</math> 3.8</b> | <b>79.0 <math>\pm</math> 3.2</b> |

Table 4: Ablation study showing contribution of each component for Llama-3

### D.2 ERROR ANALYSIS AND FAILURE MODES

Table 5 breaks down failures by error type across domains. Blocksworld shows low incorrect effect application (1.4%), indicating good action semantics, with failures dominated by precondition violations (2.1%) and non-achievement (1.8%). Mystery Blocksworld differs dramatically: incorrect effect application reaches 12.4% (9 $\times$  higher), suggesting semantic obfuscation—not logical reasoning—is the bottleneck. The model cannot map obfuscated predicate names to their effects despite learning precise logical reasoning. Logistics shows balanced errors across categories with higher invalid sequences (2.8%), reflecting multi-step reasoning challenges.

PDDL-INSTRUCT effectively reduces logical reasoning errors but struggles with semantic grounding (obfuscated predicates) and long-horizon state consistency. Future work combining semantic alignment with verification-guided training could address these limitations.

| Error Type                   | Blocksworld | Mystery BW  | Logistics   |
|------------------------------|-------------|-------------|-------------|
| Precondition Violation       | 2.1         | 8.7         | 5.3         |
| Incorrect Effect Application | 1.4         | 12.4        | 6.8         |
| Goal Not Achieved            | 1.8         | 9.2         | 6.1         |
| Invalid Action Sequence      | 0.7         | 5.7         | 2.8         |
| <b>Total Failure Rate</b>    | <b>6.0</b>  | <b>36.0</b> | <b>21.0</b> |

Table 5: Breakdown of planning failures by error type (%) for Llama-3 with Phase 1 and Phase 2 with Detailed Feedback and  $\eta = 15$

### D.3 CROSS-DOMAIN GENERALIZATION

While our multi-domain training demonstrates that a single model can learn planning across structurally different domains, a more stringent test of generalization is cross-domain transfer, i.e., training on a subset of domains and evaluating on a held-out domain.

**Experimental Setup** We train models exclusively on Blocksworld and Logistics, completely excluding Mystery Blocksworld from training, then evaluate on held-out Mystery Blocksworld test problems using PDDL-INSTRUCT (Phase 1 + Phase 2 with detailed feedback). Although Mystery Blocksworld shares the same underlying action structure and problem formulation as Blocksworld, it introduces an important challenge that semantically obfuscated predicate names that bear no relation to their actual effects. This semantic change, while structurally small, represents a significant test of whether models learn to reason about abstract planning principles versus memorizing domain-specific semantics.

**Results and Discussion** As shown in Table 6, comparing the cross-domain performance against in-domain performance (models trained on all three domains including Mystery Blocksworld) reveals encouraging signs of transfer. For Llama-3, the performance gap is a modest 5-6 percentage points (59% in-domain down to 54% cross-domain at  $\eta = 10$ ; 64% in-domain down to 58% cross-domain at  $\eta = 15$ ), representing only 8-9% relative degradation. Notably, Gemma-3 with  $\eta = 15$  shows negligible difference between in-domain (28%) and cross-domain (29%) performance, suggesting the model learns generalizable logical reasoning patterns that transfer to semantically obfuscated domains. However, Gemma-3 with  $\eta = 10$  shows a 3 percentage point gap (24% in-domain down to 21% cross-domain), indicating that additional feedback iterations help bridge the semantic gap. These results suggest that while semantic obfuscation in Mystery Blocksworld is challenging, the logical reasoning framework learned from Blocksworld and Logistics does transfer meaningfully to unseen domains. The smaller performance gaps for Llama-3 (8-9%) indicate that PDDL-INSTRUCT develops domain-agnostic planning reasoning rather than memorizing domain-specific patterns. These findings support deploying trained models on new planning domains with reasonable performance expectations, while fine-tuning on target domains would further improve results.

| Model   | Iteration Limit | In-Domain | Cross-Domain   |
|---------|-----------------|-----------|----------------|
| Llama-3 | $\eta = 10$     | 59%       | 54% $\pm$ 3.2% |
|         | $\eta = 15$     | 64%       | 58% $\pm$ 2.8% |
| Gemma-3 | $\eta = 10$     | 24%       | 21% $\pm$ 2.1% |
|         | $\eta = 15$     | 28%       | 29% $\pm$ 2.4% |

Table 6: Cross-domain generalization: Mystery Blocksworld performance when included vs. excluded from training set. Results for Llama-3 and Gemma-3 with detailed feedback.

#### D.4 INTEGRATION WITH LLM-MODULO FRAMEWORK

The LLM-Modulo framework operates as a Generate-Test-Critique loop where an LLM generates candidate plans, critics verify them, and feedback guides refinement until a valid plan is found. A key insight is that if the LLM generates more accurate plans initially, fewer Generate-Test-Critique iterations are required before finding a valid solution. In this section, we empirically validate this claim by measuring the average number of iterations needed in the LLM-Modulo framework when using baseline vs. PDDL-INSTRUCT-trained models.

**Experimental Setup** We simulate the LLM-Modulo framework by having models generate plans iteratively, with VAL providing feedback after each generation. We measure how many iterations are required before the model produces a valid plan, up to a maximum of 20 iterations. If a valid plan is not found within 20 iterations, we record it as requiring 20+ iterations (indicating practical failure).

**Results and Discussion** Table 7 shows the average number of iterations required to find a valid plan for baseline and PDDL-INSTRUCT models across domains. The results strongly support

| <u>Model</u> | <u>Domain</u>      | <u>Baseline</u>                  | <u>PDDL-INSTRUCT</u>             | <u>Speedup</u>                |
|--------------|--------------------|----------------------------------|----------------------------------|-------------------------------|
| Llama-3      | <u>Blocksworld</u> | <u><math>12.4 \pm 2.1</math></u> | <u><math>1.8 \pm 0.6</math></u>  | <u><math>6.9\times</math></u> |
|              | <u>Mystery BW</u>  | <u><math>18.8 \pm 3.4</math></u> | <u><math>5.2 \pm 1.8</math></u>  | <u><math>3.6\times</math></u> |
|              | <u>Logistics</u>   | <u><math>16.4 \pm 3.1</math></u> | <u><math>3.8 \pm 1.2</math></u>  | <u><math>4.3\times</math></u> |
| GPT-4        | <u>Blocksworld</u> | <u><math>11.4 \pm 1.9</math></u> | <u><math>1.6 \pm 0.5</math></u>  | <u><math>7.1\times</math></u> |
|              | <u>Mystery BW</u>  | <u><math>17.2 \pm 3.2</math></u> | <u><math>4.8 \pm 1.6</math></u>  | <u><math>3.6\times</math></u> |
|              | <u>Logistics</u>   | <u><math>15.2 \pm 2.8</math></u> | <u><math>3.4 \pm 1.1</math></u>  | <u><math>4.5\times</math></u> |
| Gemma-3      | <u>Blocksworld</u> | <u><math>14.6 \pm 2.7</math></u> | <u><math>8.2 \pm 2.4</math></u>  | <u><math>1.8\times</math></u> |
|              | <u>Mystery BW</u>  | <u><math>19.8 \pm 3.9</math></u> | <u><math>11.4 \pm 3.1</math></u> | <u><math>1.7\times</math></u> |
|              | <u>Logistics</u>   | <u><math>19.0 \pm 3.5</math></u> | <u><math>10.6 \pm 2.9</math></u> | <u><math>1.8\times</math></u> |

Table 7: Average iterations required in LLM-Modulo framework to generate valid plans (max 20 iterations). Results show mean  $\pm$  SD over 5 experimental runs. Speedup shows the factor improvement of PDDL-INSTRUCT over baseline.

our claim that PDDL-INSTRUCT-trained models dramatically reduce the number of iterations required in the LLM-Modulo framework. For Llama-3, the speedup ranges from 3.6–6.9 $\times$ . Even for the weaker Gemma-3 model, we observe consistent 1.7–1.8 $\times$  speedup. These improvements demonstrate that by enhancing the quality of LLM-generated candidates through instruction tuning, we substantially reduce the computational cost and latency of the Generate-Test-Critique loop. This makes PDDL-INSTRUCT particularly valuable for deployment scenarios where latency and computational efficiency matter. The framework enables a more practical path toward reliable LLM-based planning: rather than relying solely on external verifiers to repeatedly correct the model, PDDL-INSTRUCT produces models that generate high-quality plans with minimal feedback loops.

## E LLM USAGE DISCLOSURE

We declare the use of LLMs (Grammarly, Claude) for grammar check and sentence restructuring. We have also used Cursor with GPT-4 for debugging issues due to CUDA settings and writing some scripts to run the experiments.
